# Supplementary material
Source: Research Square preprint supplement (doi:10.21203/rs.3.rs-9225158/v1)
Supplement: Supplementary file 1 [file a175af1095062b0f35182bf9.xlsx]

## Sheet: Supplementary Table 1
Supplementary Table 1: Correlation between fetal globin ratio (FGR) and hematological indices. MCH: Mean Corpuscular Hemoglobin, MCV: Mean Corpuscular Volume, RBC: Red Blood cell Count, MCHC: Mean Corpuscular Hemoglobin Concentration, WBC: White Blood cell Count, RDW: Red cell Distribution width, ESR: Erythrocyte Sedimentation Rate, MPV: Mean Platelet Volume.
Phenotype	r2 with FGR	P value
MCH	0.206	1.34e-210
MCV	0.175	2.5e-150
RBC	-0.133	6.57e-87
MCHC	0.114	2.79e-64
WBC	-0.0677	8.48e-24
Neutrophils	-0.0593	1.28e-18
Eosinophils	-0.0568	3.25e-17
RDW	-0.056	7.72e-16
Lymphocytes	-0.0485	5.76e-13
Monocyte	-0.0485	5.77e-13
Platelet count	-0.0479	1.1e-12
Hematocrit	-0.0413	8.26e-10
Basophils	-0.0232	0.00059
Hemoglobin	-0.00504	0.455
ESR	0.00287	0.706
MPV	-0.00197	0.776

## Sheet: Supplementary Table 2
Supplementary Table 2. Associations of sequence variants under the additive model with fetal globin ratio, FGR, in Iceland (n = 22,093). Effect is shown for the minor allele in percent change from the mean. LD-class: Total number of variants correlating with R2 > 0.8 to the index variant, Amin: minor allele, Amaj: major allele, MAF: minor allele frequency, Covariate in cFGR GWAS: Variants at BCL1…
Locus #	rsName	Position (Hg38)	Gene or location	LD-Class	Amin/Amaj	MAF	P value	Effect estimate (% change +/- 95% CI)	Joint effect estimate* (% change +/- 95% CI)	Covariate in cFGR GWAS
1	rs2360962	chr1:199035580	PTPRC	13	A/T	25.55	1.4175e-12	8.1 (5.8, 10.5)	8.1	no
2	rs3811444	chr1:247876149	TRIM58	1	T/C	34.243	7.7979e-09	6.0 (3.9, 8.1)	6	no
3	rs6730558	chr2:8616053	ID2	16	T/C	37.501	1.1927e-13	-7.6 (-9.5, -5.7)	-7.6	no
4	rs113295791	chr2:59072617	BCL11A	32	A/C	10.621	2.5484e-13	-10.7(-13.3,-7.9)	-10.7	no
4	rs546721888	chr2:60457450	BCL11A	1	G/A	0.546	3.9176e-43	-55.3(-60.2,-49.9)	-51.9	yes
4	rs1427407	chr2:60490908	BCL11A	6	T/G	13.419	1.6E-707	125.6(125.6,125.6)	89.9	yes
4	rs35259900	chr2:60491420	BCL11A	6	T/C	2.249	8.7135e-29	-27.6(-31.6,-23.4)	-26.7	yes
4	rs7606173	chr2:60498316	BCL11A	5	C/!	37.797	9.5E-309	-32.1(-33.4,-30.7)	-31	yes
5	rs10529764	chr3:71208536	FOXP1	3	TTCTG/!	18.569	6.7181e-13	9.2 (6.6, 11.9)	9.2	no
6	rs45553631	chr6:90271938	BACH2	60	T/C	35.008	1.4695e-17	9.8(7.5,12.2)	9.8	no
7	rs1165442711	chr6:134402916	HBS1L-MYB	5	T/TTCCC	0.842	5.1185e-35	87.4(70.2,106.4)	87.4	yes
7	rs34825830	chr6:135062080	HBS1L-MYB	77	T/TAAA	36.171	8.8316e-167	-30.0(-31.7,-28.2)	-20.7	yes
7	rs9402682	chr6:135085045	HBS1L-MYB	7	T/!	23.319	7.8157e-45	19.0(16.2,22.0)	20.9	yes
7	rs66650371	chr6:135097494	HBS1L-MYB	28	T/TTAC	27.047	5.0E-1150	117.0(117.0,117.0)	183.7	yes
7	rs592423	chr6:139519556	HBS1L-MYB	32	A/C	46.035	5.2269e-29	11.0(9.0,13.0)	11	no
8	rs748303990	chr9:132989107	GFI1B	4	G/A	0.214	4.6567e-13	84.3 (56.2, 117.5)	84.3	no
8	rs150813342	chr9:132989126	GFI1B	1	T/C	1.621	1.4744e-27	51.6(40.6,63.3)	51.2	no
9	rs147169118	chr11:5151999	HBG2/HBB	14	T/C	2.811	2.4126e-25	-25.1(-29.0,-20.9)	-25.3	no
9	rs139741997	chr11:5157775	HBG2/HBB	3	C/T	3.812	2.075e-19	25.2(19.2,31.5)	23.8	no
9	rs12804838	chr11:5195225	HBG2/HBB	28	A/T	14.245	8.4957e-13	-9.3(-11.7,-6.8)	-9.3	no
9	rs35406175	chr11:5234420	HBG2/HBB	9	A/G	0.279	3.5887e-17	121.6(84.2,166.7)	119.2	no
9	rs7482144	chr11:5250015	HBG2/HBB	1	A/G	28.491	2.4845e-28	33.6(26.9,40.6)	33.7	yes
9	rs34306743	chr11:5251323	HBG2/HBB	36	GA/G	34.818	3.2E-1105	103.3(103.3,103.3)	81.2	yes
9	rs1305666297	chr11:5254818	HBG2/HBB	1	A/T	0.259	8.7069e-18	121.6(84.8,165.7)	119.2	yes
9	rs75356043	chr11:5272002	HBG2/HBB	2	TA/T	27.61	2.1924e-37	16.0(13.4,18.7)	18.5	yes
9	rs1187402448	chr11:5353829	HBG2/HBB	6	TTTTTAGGA/T	0.11	6.661e-59	774.4(572.4,1037.0)	830.9	yes
10	rs74035509	chr16:88500925	ZFPM1	4	T/C	7.177	2.617e-13	-18.0(-22.3,-13.6)	-18	no
10	rs1233233269	chr16:88534223	ZFPM1	5	G/!	0.074	3.687e-10	-57.9(-67.8,-44.8)	-57.9	no
11	rs1459099	chr18:25941157	SS18	28	C/T	39.186	9.3849e-11	6.6(4.5,8.7)	6.6	no
12	rs9748585	chr18:54226083	MBD2	28	T/C	40.589	2.6965e-09	6.0 (4.0, 8.0)	6	no
13	rs1281124736	chr19:4067023	ZBTB7A	2	T/C	0.049	2.8215e-17	292.8(186.0,439.4)	293.7	no
14	rs371672305	chr19:4499345	CHAF1A	8	C/CA	40.684	1.8335e-12	7.1(5.0,9.1)	7.1	no
15	rs11085824	chr19:12890733	GCDH,KLF1	59	CT/!	18.492	7.4737e-28	-10.2(-11.9,-8.4)	-10.2	no
16	rs2304098	chr19:19535463	GATAD2A	154	C/T	34.788	2.955e-10	-6.2 (-8.0, -4.3)	-6.2	no
17	rs3861818	chr20:32382628	POFUT1	336	A/!	44.138	7.5421e-10	-5.8(-7.5,-4.0)	-5.8	no
18	rs5997982	chr22:21457702	HIC2	1	T/C	7.226	9.8382e-23	20.0 (15.7, 24.4)	20.1	no
* Joint effect estimate using using multible regression on all independent variants at locus

## Sheet: Supplementary Table 3
Supplementary Table 3. Associations of sequence variants under the additive model with conditioned fetal globin ratio, cFGR, in Iceland (n = 22,093). Associations were conditioned on 14 variants most significantly associated with FGR(Supplementary Table 2). Effect is shown for minor allele as percentage change from the mean. Amin: minor allele, Amaj: major allele, LD class size: Total number of v…
Locus #	rs name	Position	Amin/Amaj	LD-class size	Variant annotation	Predicted causal gene (variant-to-gene)	MAF	P value	Effect estimate (% change +/- 95% CI)
1	rs2360962	chr1:199035580	A/T	13	intergenic	PTPRC	25.55	2.6355e-19	8.1 (5.8, 10.5)
2	rs3811444	chr1:247876149	T/C	1	missense (Thr374Met)	TRIM58	34.243	7.409e-15	6.0 (3.9, 8.1)
3	rs6730558	chr2:8616053	T/C	16	regulatory region	ID2	37.501	2.5097e-22	-7.6 (-9.5, -5.7)
4	rs113295791	chr2:59072617	A/C	32	intergenic	BCL11A	10.621	3.1134e-17	-10.6 (-13.3, -7.8)
4	rs6724431	chr2:60509702	T/C	17	intron	BCL11A	39.276	2.9089e-13	5.0 (2.8, 7.4)
4	rs3765154	chr2:60556437	T/C	4	upstream	BCL11A	28.853	2.2066e-19	8.9 (6.4, 11.4)
4	rs149568009	chr2:60686811	G/A	1	intergenic	BCL11A	1.309	7.5098e-11	-19.5 (-26.0, -12.4)
5	rs145917030	chr2:100168794	TTGTG/!	111	intergenic	AFF3	35.994	3.1575e-17	5.4 (3.2, 7.7)
6	rs1047891	chr2:210675783	A/C	2	missense (Thr955Asn)	CPS1	26.36	4.34e-08	4.8 (2.4, 7.3)
7	rs377468281	chr3:20061834	A/ATATAT	2	intron, eQTL (blood)	KAT2B	28.071	6.424e-10	-5.3 (-7.3, -3.3)
8	rs10529764	chr3:71208536	TTCTG/!	3	intron	FOXP1	18.569	1.904e-20	9.2 (6.6, 11.9)
9	rs6866330	chr5:3604638	T/G	1	downstream	IRX1	46.969	9.4527e-10	4.1 (2.2, 6.1)
10	rs116239840	chr6:21722739	C/A	43	upstream, TF binding site	SOX4	16.386	1.057e-15	-7.8 (-10.4, -5.2)
11	rs45553631	chr6:90271938	T/C	60	5'UTR	BACH2	35.008	2.4902e-31	9.5 (7.1, 11.9)
12	rs35673155	chr6:109303091	!/CAA	109	downstream, eQTL (blood)	CD164	47.008	2.6843e-11	-4.6 (-6.5, -2.6)
13	rs668887	chr6:139514643	G/A	9	intergenic	CITED2	3.33	2.1407e-16	27.0 (19.8, 34.7)
13	rs592423	chr6:139519556	A/C	32	upstream, regulatory region	CITED2	46.035	8.6944e-33	10.6 (8.3, 12.9)
14	rs113757047	chr9:21301524	C/A	9	downstream	IFNA5	3.922	3.1873e-10	-12.1 (-16.2, -7.7)
15	rs748303990	chr9:132989107	G/A	4	missense (His186Arg)	GFI1B	0.214	9.2967e-25	84.3 (56.2, 117.5)
15	rs150813342	chr9:132989126	T/C	1	synonymous, sQTL (blood)	GFI1B	1.621	2.6339e-42	51.7 (40.8, 63.5)
16	rs147169118	chr11:5151999	T/C	14	downstream	HBG2/HBB	2.811	5.1809e-42	-25.2 (-29.2, -21.1)
16	rs12804838	chr11:5195225	A/T	28	downstream	HBG2/HBB	14.245	3.1692e-15	-9.6 (-11.9, -7.1)
16	rs35406175	chr11:5234420	A/G	9	missense (Thr5Ile)	HBG2/HBB	0.279	8.8967e-24	119.9 (82.8, 164.5)
16	rs190495739	chr11:5234696	T/C	1	upstream	HBG2/HBB	2.783	2.4986e-32	33.9 (26.5, 41.6)
17	rs151127828	chr11:118335406	A/G	4	downstream	CD3D	1.595	2.1402e-09	-16.7 (-23.3, -9.6)
18	rs79755767	chr12:54304624	A/G	9	upstream	NFE2	8.877	1.4144e-13	-8.7 (-11.6, -5.6)
19	rs9938550	chr16:30987821	A/G	94	downstream, eQTL (blood)	SETD1A, ORAI3	37.106	1.9241e-09	-4.2 (-6.0, -2.2)
20	rs1415185611	chr16:67556702	C/!	2	intergenic	CTCF	14.376	2.7192e-14	-6.7 (-9.2, -4.1)
21	rs4782366	chr16:88457890	C/T	14	intron	ZFPM1	38.696	4.8886e-12	-4.7 (-6.5, -2.8)
21	rs984199988	chr16:88500925	T/C	4	intron	ZFPM1	7.177	2.8425e-22	-12.3 (-15.4, -9.0)
21	rs1233233269	chr16:88534223	G/!	5	frameshift	ZFPM1	0.074	4.2751e-15	-56.8 (-67.0, -43.4)
22	rs1459099	chr18:25941157	C/T	28	intergenic	SS18	39.186	4.4666e-12	6.5 (4.4, 8.5)
23	rs9748585	chr18:54226083	T/C	28	upstream	MBD2	40.589	7.1314e-18	6.0 (4.0, 8.0)
24	rs1281124736	chr19:4067023	T/C	2	5´UTR/upstream ATG	ZBTB7A	0.049	8.1981e-25	299.9 (191.2, 449.0)
24	rs59394312	chr19:4070165	G/C	44	upstream	ZBTB7A	16.554	1.4164e-11	7.2 (4.5, 9.9)
25	rs11668886	chr19:4423422	T/C	44	intron	CHAF1A	23.414	1.0925e-13	-6.6 (-8.6, -4.5)
26	rs11085824	chr19:12890733	G/A	59	upstream	GCDH,KLF1	40.4	2.2193e-38	-10.2 (-11.9, -8.4)
27	rs2304098	chr19:19535463	C/T	154	upstream	GATAD2A	34.788	7.4662e-14	-6.2 (-8.0, -4.3)
28	rs78744187	chr19:33263642	T/C	1	downstream, eQTL (blood)	CEBPA	9.929	8.1841e-10	-6.8 (-9.7, -3.8)
29	rs139946019	chr20:32240836	ATTATTTATTTAT/!	1	downstream	POFUT1	35.956	2.9752e-17	-5.5 (-7.4, -3.7)
30	rs61188026	chr20:45928576	AAGAG/!	35	upstream, pQTL, eQTL (blood)	PLTP	23.146	3.3473e-10	-5.9 (-7.9, -3.7)
31	rs1153291	chr21:29316749	G/T	64	intron	BACH1	43.187	4.6739e-10	4.0 (2.0, 6.0)
32	rs1483815341	chr22:18555034	A/G	1	intergenic	TMEM191B	2.801	4.1219e-13	18.0 (11.0, 25.4)
33	rs5997982	chr22:21457702	T/C	1	regulatory region	HIC2	7.226	4.4292e-41	20.0 (15.7, 24.4)
34	.	chrX:55021193x	C/T	1	missense (Lys166Arg)	ALAS2	0.152	6.7812e-09	-45.3 (-58.9, -27.0)
	x results shown from males only

## Sheet: Supplementary Table 4
Supplementary Table 4. Replication of previously published associations with fetal hemoglobin from the GWAS catalog. Variants were tested for association under the additive model with conditioned fetal globin ratio, FGR, in Iceland (n = 22,093). Effect is shown for the minor allele in percent change from the mean. Amin: minor allele, Amaj: major allele, MAF: minor allele frequency. FDR-adjusted p…
								GWAS catalog info
Marker	Position (Hg38)	Gene	Amin/Amaj	MAF	Percent change	p-value	q-value	Study accession	PubMed ID	First author	Discovery ancestry	Publication date	Reported trait	Not replicated
rs12073837	chr1:220836863	HLX-AS1,LINC01352	T/C	27.595	0	1	1	GCST000982	21326311	Bhatnagar P	African American or Afro-Caribbean	2011-02-17	F-cell distribution	√
rs2577720	chr2:23325743	.	A/C	45.605	2.26057	0.053722	0.0714194	GCST000982	21326311	Bhatnagar P	African American or Afro-Caribbean	2011-02-17	F-cell distribution	√
rs13019832	chr2:60483436	BCL11A	A/G	36.713	-40.1987	5.0E-535	<1E-300	GCST003122	26366553	Danjou F	Sardinian	2015-09-14	fetal hemoglobin
rs10189857	chr2:60486100	BCL11A	A/G	49.849	-8.55349	5.5727e-19	8.83077e-19	GCST000982	21326311	Bhatnagar P	African American or Afro-Caribbean	2011-02-17	F-cell distribution
rs6545816	chr2:60487726	BCL11A	A/C	39.583	3.40995	0.0066227	0.00902	GCST000982	21326311	Bhatnagar P	African American or Afro-Caribbean	2011-02-17	F-cell distribution
rs6545817	chr2:60488044	BCL11A	C/T	39.728	3.40995	0.0035234	0.00494828	GCST000982	21326311	Bhatnagar P	African American or Afro-Caribbean	2011-02-17	F-cell distribution
rs1427407	chr2:60490908	BCL11A	T/G	13.419	126.126	5.0E-709	<1E-300	GCST000982	21326311	Bhatnagar P	African American or Afro-Caribbean	2011-02-17	F-cell distribution
rs7599488	chr2:60491212	BCL11A	C/T	49.962	-8.55349	4.5386e-19	7.38e-19	GCST000982	21326311	Bhatnagar P	African American or Afro-Caribbean	2011-02-17	F-cell distribution
rs1896294	chr2:60491939	BCL11A	C/T	33.618	65.3617	5.0E-494	<1E-300	GCST000982	21326311	Bhatnagar P	African American or Afro-Caribbean	2011-02-17	F-cell distribution
rs766432	chr2:60492835	BCL11A	C/A	13.339	123.612	5.0E-696	<1E-300	GCST000982	21326311	Bhatnagar P	African American or Afro-Caribbean	2011-02-17	F-cell distribution
rs766432	chr2:60492835	BCL11A	C/A	13.339	123.612	5.0E-696	<1E-300	GCST000545	20018918	Solovieff N	African unspecified and East Asian	2009-12-16	fetal hemoglobin
rs766432	chr2:60492835	BCL11A	C/A	13.339	123.612	5.0E-696	<1E-300	GCST006251	27022141	Liu L	African American or Afro-Caribbean	2016-03-27	fetal hemoglobin
rs11886868	chr2:60493111	BCL11A	C/T	33.636	65.3617	5.0E-491	<1E-300	GCST000150	18245381	Uda M	European	2008-02-05	fetal hemoglobin
rs10195871	chr2:60493454	BCL11A	A/G	33.564	65.3617	5.0E-494	<1E-300	GCST000982	21326311	Bhatnagar P	African American or Afro-Caribbean	2011-02-17	F-cell distribution
rs10172646	chr2:60493622	BCL11A	G/A	33.564	65.3617	5.0E-494	<1E-300	GCST000982	21326311	Bhatnagar P	African American or Afro-Caribbean	2011-02-17	F-cell distribution
rs4671393	chr2:60493816	BCL11A	A/G	13.316	126.126	5.0E-699	<1E-300	GCST000982	21326311	Bhatnagar P	African American or Afro-Caribbean	2011-02-17	F-cell distribution
rs7584113	chr2:60494176	BCL11A	A/G	33.552	65.3617	5.0E-495	<1E-300	GCST000982	21326311	Bhatnagar P	African American or Afro-Caribbean	2011-02-17	F-cell distribution
rs7557939	chr2:60494212	BCL11A	G/A	33.564	65.3617	5.0E-493	<1E-300	GCST000982	21326311	Bhatnagar P	African American or Afro-Caribbean	2011-02-17	F-cell distribution
rs6706648	chr2:60494905	BCL11A	T/C	27.614	-36.7615	5.0E-360	<1E-300	GCST000982	21326311	Bhatnagar P	African American or Afro-Caribbean	2011-02-17	F-cell distribution
rs6738440	chr2:60495106	BCL11A	G/A	24.755	-33.1268	2.6405e-248	5.07619e-248	GCST000982	21326311	Bhatnagar P	African American or Afro-Caribbean	2011-02-17	F-cell distribution
rs7565301	chr2:60496131	BCL11A	A/G	28.633	5.74761	1.2647e-06	1.90357e-06	GCST000982	21326311	Bhatnagar P	African American or Afro-Caribbean	2011-02-17	F-cell distribution
rs6729815	chr2:60496537	BCL11A	T/C	40.903	1.12397	0.24133	0.3075	GCST000982	21326311	Bhatnagar P	African American or Afro-Caribbean	2011-02-17	F-cell distribution	√
rs1896295	chr2:60496951	BCL11A	T/C	13.285	126.126	5.0E-698	<1E-300	GCST000982	21326311	Bhatnagar P	African American or Afro-Caribbean	2011-02-17	F-cell distribution
rs1896296	chr2:60496952	BCL11A	G/T	13.285	126.126	5.0E-698	<1E-300	GCST000982	21326311	Bhatnagar P	African American or Afro-Caribbean	2011-02-17	F-cell distribution
rs7606173	chr2:60498316	BCL11A	C/!	37.797	-40.8633	5.0E-572	<1E-300	GCST000982	21326311	Bhatnagar P	African American or Afro-Caribbean	2011-02-17	F-cell distribution
rs1845344	chr4:120041230	.	T/G	31.674	0	0.75535	0.798974	GCST000982	21326311	Bhatnagar P	African American or Afro-Caribbean	2011-02-17	F-cell distribution	√
rs10017284	chr4:120592060	.	G/A	45.397	-1.11148	0.58474	0.636579	GCST000982	21326311	Bhatnagar P	African American or Afro-Caribbean	2011-02-17	F-cell distribution	√
rs1318772	chr5:113387870	MCC	G/A	12.946	2.26057	0.2462	0.310606	GCST000982	21326311	Bhatnagar P	African American or Afro-Caribbean	2011-02-17	F-cell distribution	√
rs17135859	chr5:113660957	LOC107986441	C/T	21.595	1.12397	0.5925	0.636579	GCST000982	21326311	Bhatnagar P	African American or Afro-Caribbean	2011-02-17	F-cell distribution	√
rs11968814	chr6:71067268	.	A/G	0.003	144.528	0.41964	0.492	GCST000982	21326311	Bhatnagar P	African American or Afro-Caribbean	2011-02-17	F-cell distribution	√
rs11754265	chr6:135035078	HBS1L-MYB	C/G	48.231	23.6597	6.993e-97	1.24783e-96	GCST003122	26366553	Danjou F	Sardinian	2015-09-14	fetal hemoglobin
rs9399137	chr6:135097880	HBS1L-MYB	C/T	27.047	116.239	5.0E-1151	<1E-300	GCST000069	17767159	Menzel S	European	2007-09-02	F-cell distribution
rs9399137	chr6:135097880	HBS1L-MYB	C/T	27.047	116.239	5.0E-1151	<1E-300	GCST003122	26366553	Danjou F	Sardinian	2015-09-14	fetal hemoglobin
rs9494145	chr6:135111414	HBS1L-MYB	C/T	24.301	109.108	5.0E-946	<1E-300	GCST002687	25372704	Mtatiro SN	Tanzanian	2014-11-05	fetal hemoglobin
rs3800569	chr7:138726680	ATP6V0A4	C/T	29.354	0	0.91893	0.943	GCST000982	21326311	Bhatnagar P	African American or Afro-Caribbean	2011-02-17	F-cell distribution	√
rs2855122	chr11:5256006	HBB/HBG2	T/C	39.935	-29.2832	1.0427e-241	1.86364e-241	GCST006251	27022141	Liu L	African American or Afro-Caribbean	2016-03-27	fetal hemoglobin
rs67385638	chr11:5269140	HBB/HBG2	G/C	35.69	99.9654	5.0E-1068	<1E-300	GCST003122	26366553	Danjou F	Sardinian	2015-09-14	fetal hemoglobin
rs4910742	chr11:5285279	HBB/HBG2	G/A	4.605	-32.3752	7.2732e-58	1.24708e-57	GCST000150	18245381	Uda M	European	2008-02-05	fetal hemoglobin
rs5006884	chr11:5352021	HBB/HBG2	T/C	24.19	-8.55349	1.2544e-11	1.97407e-11	GCST000545	20018918	Solovieff N	African unspecified	2009-12-16	fetal hemoglobin
rs183437571	chr19:13011085	NFIX	T/C	0.001	-46.5227	0.53616	0.615	GCST003122	26366553	Danjou F	Sardinian	2015-09-14	fetal hemoglobin	√
rs12559632	chrX:22142875	PHEX	A/G	21.53	-1.11148	0.33129	0.397941	GCST000982	21326311	Bhatnagar P	African American or Afro-Caribbean	2011-02-17	F-cell distribution	√

## Sheet: Supplementary Table 5
Supplementary Table 5. Replication of GWAS findings of a recently prepublished medRxiv pape rby Cato et al (2023). Variants were tested for association under the additive model with conditioned fetal globin ratio, cFGR, in Iceland (n = 22,093). Effect is shown for the minor allele in percent change from the mean. Amin: minor allele, Amaj: major allele, MAF: minor allele frequency. FDR-adjusted p-…
Locus #	Marker	Position	Gene	Amin/Amaj	Consequence	MAF	FGR - Pval	q-value	Percent change	Not replicated
1	rs243016	chr2:60361578	BCL11A	T/A	intergenic	35.377	8.1095e-72	2.18957e-70	-17.7657
1	rs181680	chr2:60362471	BCL11A	T/A	intergenic	43.817	1.6416e-84	3.44736e-83	22.422
1	rs56168568	chr2:60388703	BCL11A	A/G	intergenic	4.165	2.2025e-10	1.2334e-08	17.9888
1	rs243073	chr2:60391555	BCL11A	T/C	regulatory region	37.433	5.4283e-78	1.24851e-76	22.2852
1	rs243065	chr2:60394929	BCL11A	C/G	intergenic	49.698	9.7283e-171	1.1674e-169	-24.8836
1	rs56317209	chr2:60407932	BCL11A	A/G	intergenic	20.471	2.19e-75	5.475e-74	26.4551
1	rs17028162	chr2:60437941	BCL11A	G/C	intergenic	1.618	4.8778e-55	1.70723e-53	88.8856
1	rs35125709	chr2:60473139	BCL11A	T/C	intron	2.886	9.1028e-65	2.82187e-63	-40.8633
1	rs66808336	chr2:60477962	BCL11A	A/T	intron	22.268	2.9978e-199	2.9978e-198	-31.078
1	rs1123573	chr2:60480453	BCL11A	G/A	intron	40.307	2.5786e-19	1.2893e-17	-9.06312
1	rs45527235	chr2:60481954	BCL11A	T/C	intron	0.754	5.4721e-27	2.46244e-25	87.8329
1	rs13019832	chr2:60483436	BCL11A	A/G	intron	36.713	<1E-300	<1E-300	-40.0648
1	rs1427407	chr2:60490908	BCL11A	T/G	intron	13.419	<1E-300	<1E-300	125.621
1	rs1896294	chr2:60491939	BCL11A	C/T	intron	33.618	<1E-300	<1E-300	65.5466
1	rs766431	chr2:60492783	BCL11A	G/A	intron	3.848	1.5828e-134	2.53248e-133	93.1555
1	rs6709302	chr2:60500494	BCL11A	A/G	intron	28.592	<1E-300	<1E-300	-37.3945
1	rs3771270	chr2:60542320	BCL11A	A/G	intron	13.828	2.5104e-104	4.76976e-103	38.2831
1	rs6739994	chr2:60543319	BCL11A	C/T	intron	17.536	2.992e-70	8.976e-69	27.306
1	rs115035772	chr2:60594012	BCL11A	C/T	intergenic	1.085	7.2642e-53	2.61511e-51	116.481
1	rs11695541	chr2:60617175	BCL11A	C/T	intergenic	5.333	1.0659e-41	4.05042e-40	35.6804
1	rs842770	chr2:60630907	BCL11A	G/A	intergenic	23.515	3.9938e-61	1.27802e-59	22.422
1	rs17537498	chr2:60672327	BCL11A	C/T	intergenic	9.717	3.653e-33	1.4612e-31	-18.9519
1	rs35980809	chr2:60674562	BCL11A	C/T	regulatory region	15.807	1.8687e-26	8.59602e-25	16.4169
2	rs11123805	chr2:100027002	AFF3	G/A	intron	48.505	8.8398e-05	0.00512708	4.10577
3	rs1010474	chr6:90147309	BACH2	C/T	intron	35.948	1.4026e-14	7.43378e-13	8.74413
4	rs1883225	chr6:134851207	HBS1L-MYB	G/A	regulatory region	25.101	2.2645e-131	3.84965e-130	-25.3857
4	rs9389237	chr6:134882641	HBS1L-MYB	C/T	TF binding	22.902	1.0369e-71	2.90332e-70	24.7703
4	rs117934600	chr6:134886643	HBS1L-MYB	G/T	intergenic	5.956	1.2864e-36	5.01696e-35	31.647
4	rs79393802	chr6:134886859	HBS1L-MYB	A/C	intergenic	3.742	4.1423e-29	1.73977e-27	36.8991
4	rs6899500	chr6:134905951	HBS1L-MYB	T/C	intergenic	30.364	2.5165e-190	2.76815e-189	39.0581
4	rs2072827	chr6:134932465	HBS1L-MYB	A/G	intron	46.301	9.5071e-60	3.23241e-58	-15.7185
4	rs2142725	chr6:134937804	HBS1L-MYB	T/G	intron	32.462	6.7359e-61	2.22285e-59	19.9836
4	rs7768278	chr6:134953819	HBS1L-MYB	C/T	upstream	34.901	4.6674e-137	6.53436e-136	30.9134
4	rs41286240	chr6:134962680	HBS1L-MYB	G/A	3'-UTR	3.564	5.4331e-76	1.30394e-74	65.7318
4	rs9389266	chr6:135090599	HBS1L-MYB	T/G	intergenic	13.929	2.6285e-135	3.94275e-134	-31.078
4	rs76200612	chr6:135093456	HBS1L-MYB	A/C	regulatory region	19.419	9.6636e-32	3.96208e-30	-14.2936
4	rs55731938	chr6:135093712	HBS1L-MYB	A/!	regulatory region	12.362	3.7453e-202	3.37077e-201	-37.7433
4	rs7743042	chr6:135098696	HBS1L-MYB	A/G	regulatory region	47.878	1.4605e-108	2.6289e-107	-20.4774
4	rs9402686	chr6:135106679	HBS1L-MYB	A/G	intergenic	27.892	<1E-300	<1E-300	113.835
4	rs145125135	chr6:135207978	HBS1L-MYB	T/C	intron	18.663	2.1709e-72	5.64434e-71	-21.5368
4	rs1013891	chr6:135217501	HBS1L-MYB	A/G	intron	26.931	2.7918e-70	8.09622e-69	-18.8613
5	rs7479815	chr11:5193641	HBB/HBG2	G/A	intergenic	37.571	5.0796e-27	2.23502e-25	-10.9739
5	rs7946748	chr11:5226496	HBB/HBG2	A/G	intron	9.364	7.7943e-13	4.28686e-11	-12.0618
5	rs10742583	chr11:5227411	HBB/HBG2	G/A	upstream	15.446	8.2925e-14	4.47795e-12	-10.2747
5	rs7948416	chr11:5235201	HBB/HBG2	A/C	upstream	22.829	4.8891e-167	6.35583e-166	-28.4084
5	rs968856	chr11:5239346	HBB/HBG2	C/T	upstream	42.712	6.5219e-292	5.21752e-291	-31.1549
5	rs2855039	chr11:5250441	HBB/HBG2	T/C	upstream	34.551	<1E-300	<1E-300	102.439
5	rs72886289	chr11:5302304	HBB/HBG2	T/C	upstream	28.225	<1E-300	<1E-300	70.6186
5	rs4271412	chr11:5336853	HBB/HBG2	C/T	intergenic	15.467	3.857e-79	8.4854e-78	31.0598
5	rs73404570	chr11:5339173	HBB/HBG2	C/T	downstream	6.047	1.2743e-89	2.5486e-88	55.1553
5	rs4910785	chr11:5411413	HBB/HBG2	G/T	intron	10.191	2.2849e-46	8.45413e-45	28.0194
5	rs1498473	chr11:5423906	HBB/HBG2	T/C	downstream	33.814	2.6673e-15	1.387e-13	-8.34884
5	rs10838102	chr11:5436401	HBB/HBG2	T/C	downstream	37.269	1.8512e-20	9.07088e-19	-9.5699
6	rs8078338	chr17:8225842	CTC1	A/G	3'-UTR	49.557	0.95797	1	0	√
6	rs9891699	chr17:8253992	PFAS	C/T	missense	18.947	0.40796	1	-1.00089	√
7	rs7259699	chr19:4072148	.	A/G	regulatory region	17.268	6.199e-23	2.97552e-21	5.62948
8	rs4804210	chr19:12879166	MAST1	G/!	downstream	30.453	1.1535e-18	5.88285e-17	10.9541
8	rs3817621	chr19:12887391	GCDH,KLF1	C/G	upstream	26.455	7.4737e-28	3.21369e-26	10.0894
8	rs11085824	chr19:12890733	GCDH,KLF1	G/A	upstream	40.389	1.0161e-24	4.77567e-23	-10.1743
8	rs2965220	chr19:12942311	RAD23A	T/C	upstream	40.477	1.5846e-05	0.000903222	-9.5699

## Sheet: Supplementary Table 6
Supplementary table 6: The table lists gene candidates for cFGR associations that are supported by eQTL evidence. It includes correlated association signals (r² > 0.8) between cFGR and the top cis-eQTLs identified in various tissues or cell types. A pairwise co-localization analysis was performed using the coloc R package to estimate the posterior probability of a shared genetic signal (PPR4). Ge…
Variant	loci	rsname_eQTL	r2	Chrom	pos_hg38_eQTL	effect_allele	P-value	Effect [sd]	colocalization - PPR4	Data-source	Tissue or celltype	#RNA-seq
chr19:4423422_C_T	UBXN6	rs139000330,rs56156435	0.88218	chr19	4444657	CCCG	6.00697e-27	-0.249134	0.728408	gtceqtl	Artery Tibial	663
chr19:33263642_C_T	CEBPA	rs78744187	1	chr19	33263642	T	1.46037e-11	-0.566556	0.999511	dcceqtl_B_cells	B-cells	758
chr19:19535463_T_C	TM6SF2	rs3764567	0.816767	chr19	19329257	T	6.25596e-15	-0.569394	0.82261	gtceqtl	Brain Cerebellum	241
chr20:45928576_A_AAGAG	PLTP	rs6073952	0.814332	chr20	45908293	A	3.9347e-23	0.54642	0.851633	dcceqtl_Monocytes	Monocytes	884
chr16:30987821_A_G	HSD3B7	rs13708	0.999857	chr16	30989488	A	2.06956e-48	-0.442723	0.97309	gtceqtl	Muscle Skeletal	803
chr19:4423422_C_T	MPND	rs11666453	0.933458	chr19	4368800	A	1.90308e-14	0.221379	0.959523	gtceqtl	Muscle Skeletal	803
chr19:4423422_C_T	CHAF1A	rs11666856	0.88221	chr19	4437453	G	5.28407e-91	-0.590839	0.733788	gtceqtl	Muscle Skeletal	803
chr19:19535463_T_C	HAPLN4	rs3764567	0.816767	chr19	19329257	T	3.39118e-10	-0.406412	0.690893	gtceqtl	Stomach	359
chr3:20061834_A_ATATAT	KAT2B	rs12636078	0.988495	chr3	20064181	G	7.57828e-13	-0.135102	0.998776	gtceqtl	Whole Blood	755
chr11:5195225_T_A	HBE1	rs11036212	0.862078	chr11	5200595	G	1.94264e-91	0.300709	2.17605e-23	dcceqtl_blood	Whole Blood	17848
chr16:30987821_A_G	SETD1A	rs4502227	0.996052	chr16	30968733	A	3.79398e-35	0.137287	0.971986	dcceqtl_blood	Whole Blood	17848
chr16:30987821_A_G	ORAI3	rs8060857	0.985911	chr16	30991399	G	2.9805e-44	0.157596	0.966347	dcceqtl_blood	Whole Blood	17848
chr16:30987821_A_G	STX1B	rs112906665	0.809778	chr16	31028818	C	6.33106e-50	0.163916	0.0646512	dcceqtl_blood	Whole Blood	17848
chr16:30987821_A_G	STX4	rs112906665	0.809778	chr16	31028818	C	0	0.819103	0.0657846	dcceqtl_blood	Whole Blood	17848
chr19:19535463_T_C	GATAD2A	rs747050	0.956986	chr19	19474178	G	0	0.607497	0.914707	dcceqtl_blood	Whole Blood	17848
chr6:109303091_C_CAA	CD164	.	0.875665	chr6	109303091	C	2.45725e-273	-0.374022	0.706137	dcceqtl_blood	Whole Blood	17848

## Sheet: Supplementary Table 7
Supplementary table 7: Gene Ontology (GO) enrichment analysis for biological process based on 38 candidate genes (see supplementary table 4). The gene ontology groups are ranked by raw p-value.
GO biological process complete	Gene ontology number	Homo sapiens - REFLIST (20580)	upload_1 (38)	upload_1 (expected)	upload_1 (over/under)	upload_1 (fold Enrichment)	upload_1 (raw P-value)	upload_1 (FDR)
negative regulation of transcription by RNA polymerase II	GO:0000122	920	18	1.7	+	10.6	6.23e-15	9.42e-11
negative regulation of DNA-templated transcription	GO:0045892	1259	18	2.32	+	7.74	1.33e-12	1.01e-08
negative regulation of RNA biosynthetic process	GO:1902679	1274	18	2.35	+	7.65	1.62e-12	8.19e-09
negative regulation of RNA metabolic process	GO:0051253	1375	18	2.54	+	7.09	5.86e-12	2.22e-08
hemopoiesis	GO:0030097	686	14	1.27	+	11.05	8.46e-12	2.56e-08
regulation of DNA-templated transcription	GO:0006355	3383	25	6.25	+	4	1.36e-11	3.43e-08
regulation of RNA biosynthetic process	GO:2001141	3402	25	6.28	+	3.98	1.55e-11	3.34e-08
negative regulation of nucleobase-containing compound metabolic process	GO:0045934	1501	18	2.77	+	6.49	2.53e-11	4.79e-08
regulation of transcription by RNA polymerase II	GO:0006357	2584	22	4.77	+	4.61	4.05e-11	6.8e-08
negative regulation of macromolecule biosynthetic process	GO:0010558	2055	20	3.79	+	5.27	5.06e-11	7.66e-08
regulation of nucleobase-containing compound metabolic process	GO:0019219	3961	26	7.31	+	3.55	5.46e-11	7.5e-08
negative regulation of cellular biosynthetic process	GO:0031327	2097	20	3.87	+	5.17	7.32e-11	9.22e-08
regulation of RNA metabolic process	GO:0051252	3657	25	6.75	+	3.7	7.88e-11	9.17e-08
negative regulation of biosynthetic process	GO:0009890	2121	20	3.92	+	5.11	9e-11	9.72e-08
erythrocyte differentiation	GO:0030218	103	7	0.19	+	36.81	7.11e-10	7.16e-07
negative regulation of cellular metabolic process	GO:0031324	2425	20	4.48	+	4.47	1e-09	9.45e-07
erythrocyte homeostasis	GO:0034101	112	7	0.21	+	33.85	1.28e-09	1.14e-06
myeloid cell differentiation	GO:0030099	296	9	0.55	+	16.47	2.64e-09	2.22e-06
negative regulation of macromolecule metabolic process	GO:0010605	2602	20	4.8	+	4.16	3.49e-09	2.77e-06
leukocyte differentiation	GO:0002521	424	10	0.78	+	12.77	3.5e-09	2.65e-06
myeloid cell homeostasis	GO:0002262	140	7	0.26	+	27.08	6.13e-09	4.42e-06
regulation of gene expression	GO:0010468	4865	26	8.98	+	2.89	6.14e-09	4.22e-06
myeloid cell development	GO:0061515	80	6	0.15	+	40.62	7.13e-09	4.69e-06
regulation of macromolecule biosynthetic process	GO:0010556	4989	26	9.21	+	2.82	1.08e-08	6.82e-06
positive regulation of cellular metabolic process	GO:0031325	3124	21	5.77	+	3.64	1.25e-08	7.54e-06
negative regulation of metabolic process	GO:0009892	2815	20	5.2	+	3.85	1.38e-08	8.04e-06
mononuclear cell differentiation	GO:1903131	362	9	0.67	+	13.46	1.52e-08	8.5e-06
regulation of cellular biosynthetic process	GO:0031326	5078	26	9.38	+	2.77	1.61e-08	8.68e-06
regulation of primary metabolic process	GO:0080090	5544	27	10.24	+	2.64	1.79e-08	9.34e-06
positive regulation of macromolecule biosynthetic process	GO:0010557	2568	19	4.74	+	4.01	2.08e-08	1.05e-05
regulation of biosynthetic process	GO:0009889	5150	26	9.51	+	2.73	2.2e-08	1.07e-05
positive regulation of cellular biosynthetic process	GO:0031328	2625	19	4.85	+	3.92	2.99e-08	1.41e-05
homeostasis of number of cells	GO:0048872	280	8	0.52	+	15.47	3.65e-08	1.67e-05
positive regulation of biosynthetic process	GO:0009891	2668	19	4.93	+	3.86	3.91e-08	1.74e-05
lymphocyte differentiation	GO:0030098	289	8	0.53	+	14.99	4.66e-08	2.01e-05
regulation of cellular metabolic process	GO:0031323	5837	27	10.78	+	2.51	5.88e-08	2.47e-05
regulation of macromolecule metabolic process	GO:0060255	5998	27	11.08	+	2.44	1.1e-07	4.48e-05
cell development	GO:0048468	2226	17	4.11	+	4.14	1.1e-07	4.39e-05
positive regulation of DNA-templated transcription	GO:0045893	1678	15	3.1	+	4.84	1.12e-07	4.35e-05
positive regulation of RNA biosynthetic process	GO:1902680	1681	15	3.1	+	4.83	1.15e-07	4.34e-05
positive regulation of nucleobase-containing compound metabolic process	GO:0045935	2009	16	3.71	+	4.31	1.76e-07	6.49e-05
positive regulation of metabolic process	GO:0009893	3677	21	6.79	+	3.09	2.31e-07	8.31e-05
positive regulation of macromolecule metabolic process	GO:0010604	3364	20	6.21	+	3.22	2.9e-07	0.000102
positive regulation of RNA metabolic process	GO:0051254	1806	15	3.33	+	4.5	2.94e-07	0.000101
regulation of hemopoiesis	GO:1903706	405	8	0.75	+	10.7	6.12e-07	0.000206
positive regulation of gene expression	GO:0010628	1180	12	2.18	+	5.51	8.04e-07	0.000264
response to stimulus	GO:0050896	8080	30	14.92	+	2.01	8.45e-07	0.000272
anatomical structure development	GO:0048856	5208	24	9.62	+	2.5	9.26e-07	0.000292
T cell differentiation	GO:0030217	182	6	0.34	+	17.85	9.61e-07	0.000297
chromatin organization	GO:0006325	786	10	1.45	+	6.89	1.12e-06	0.000337
regulation of metabolic process	GO:0019222	6519	27	12.04	+	2.24	1.22e-06	0.000363
multicellular organismal-level homeostasis	GO:0048871	614	9	1.13	+	7.94	1.33e-06	0.000386
alpha-beta T cell activation	GO:0046631	107	5	0.2	+	25.31	1.51e-06	0.000432
regulation of cell development	GO:0060284	815	10	1.5	+	6.65	1.55e-06	0.000433
T cell activation	GO:0042110	321	7	0.59	+	11.81	1.75e-06	0.000482
chromatin remodeling	GO:0006338	637	9	1.18	+	7.65	1.8e-06	0.000486
regulation of cell differentiation	GO:0045595	1534	13	2.83	+	4.59	1.93e-06	0.000511
lymphocyte activation	GO:0046649	478	8	0.88	+	9.06	2.12e-06	0.000552
protein-DNA complex organization	GO:0071824	878	10	1.62	+	6.17	3.02e-06	0.000774
negative regulation of cellular process	GO:0048523	4749	22	8.77	+	2.51	4e-06	0.00101
immune system process	GO:0002376	2301	15	4.25	+	3.53	6.39e-06	0.00158
developmental process	GO:0032502	5711	24	10.55	+	2.28	9.77e-06	0.00238
response to stress	GO:0006950	3411	18	6.3	+	2.86	9.8e-06	0.00235
regulation of developmental process	GO:0050793	2409	15	4.45	+	3.37	1.12e-05	0.00266
leukocyte activation	GO:0045321	600	8	1.11	+	7.22	1.12e-05	0.00262
T cell activation involved in immune response	GO:0002286	81	4	0.15	+	26.74	1.48e-05	0.0034
granulocyte differentiation	GO:0030851	27	3	0.05	+	60.18	1.65e-05	0.00372
negative regulation of biological process	GO:0048519	5171	22	9.55	+	2.3	1.75e-05	0.00389
cellular response to stress	GO:0033554	1589	12	2.93	+	4.09	1.75e-05	0.00384
negative regulation of cell differentiation	GO:0045596	647	8	1.19	+	6.7	1.94e-05	0.00419
cell differentiation	GO:0030154	3638	18	6.72	+	2.68	2.45e-05	0.00522
cellular developmental process	GO:0048869	3641	18	6.72	+	2.68	2.48e-05	0.0052
regulation of cell population proliferation	GO:0042127	1665	12	3.07	+	3.9	2.8e-05	0.0058
negative regulation of developmental process	GO:0051093	896	9	1.65	+	5.44	2.82e-05	0.00575
positive T cell selection	GO:0043368	34	3	0.06	+	47.79	3.34e-05	0.00673
cell activation	GO:0001775	726	8	1.34	+	5.97	4.41e-05	0.00878
cellular response to stimulus	GO:0051716	6306	24	11.64	+	2.06	5.11e-05	0.01
negative regulation of gene expression	GO:0010629	985	9	1.82	+	4.95	5.9e-05	0.0114
positive regulation of transcription by RNA polymerase II	GO:0045944	1245	10	2.3	+	4.35	6.3e-05	0.012
ventricular septum morphogenesis	GO:0060412	42	3	0.08	+	38.68	6.34e-05	0.012
heart development	GO:0007507	564	7	1.04	+	6.72	6.75e-05	0.0126
CD4-positive alpha-beta T cell differentiation involved in immune response	GO:0002294	43	3	0.08	+	37.78	6.81e-05	0.0126
erythrocyte development	GO:0048821	43	3	0.08	+	37.78	6.81e-05	0.0124
T-helper cell differentiation	GO:0042093	43	3	0.08	+	37.78	6.81e-05	0.0123
positive regulation of gamma-delta T cell differentiation	GO:0045588	7	2	0.01	+	> 100	6.93e-05	0.0123
alpha-beta T cell differentiation involved in immune response	GO:0002293	44	3	0.08	+	36.93	7.3e-05	0.0128
alpha-beta T cell activation involved in immune response	GO:0002287	44	3	0.08	+	36.93	7.3e-05	0.0127
animal organ development	GO:0048513	2843	15	5.25	+	2.86	8.16e-05	0.014
T cell selection	GO:0045058	47	3	0.09	+	34.57	8.9e-05	0.0151
T cell differentiation involved in immune response	GO:0002292	48	3	0.09	+	33.85	9.49e-05	0.0159
response to chemical	GO:0042221	3643	17	6.73	+	2.53	0.000103	0.0171
lymphocyte activation involved in immune response	GO:0002285	135	4	0.25	+	16.05	0.00011	0.0181
positive regulation of biological process	GO:0048518	6177	23	11.41	+	2.02	0.000115	0.0186
regulation of gamma-delta T cell differentiation	GO:0045586	9	2	0.02	+	> 100	0.000119	0.0191
positive regulation of gamma-delta T cell activation	GO:0046645	9	2	0.02	+	> 100	0.000119	0.0189
multicellular organismal process	GO:0032501	6239	23	11.52	+	2	0.000129	0.0203
CD4-positive alpha-beta T cell differentiation	GO:0043367	55	3	0.1	+	29.54	0.000143	0.0222
regulation of multicellular organismal development	GO:2000026	1384	10	2.56	+	3.91	0.000152	0.0235
response to hypoxia	GO:0001666	287	5	0.53	+	9.44	0.000175	0.0268
myeloid leukocyte differentiation	GO:0002573	153	4	0.28	+	14.16	0.000178	0.0269
urea cycle	GO:0000050	11	2	0.02	+	98.47	0.000181	0.027
regulation of gamma-delta T cell activation	GO:0046643	11	2	0.02	+	98.47	0.000181	0.0268
tube development	GO:0035295	900	8	1.66	+	4.81	0.000197	0.0289
homeostatic process	GO:0042592	1429	10	2.64	+	3.79	0.000198	0.0288
nitrogen cycle metabolic process	GO:0071941	12	2	0.02	+	90.26	0.000217	0.0312
positive thymic T cell selection	GO:0045059	12	2	0.02	+	90.26	0.000217	0.0309
urea metabolic process	GO:0019627	12	2	0.02	+	90.26	0.000217	0.0306
response to decreased oxygen levels	GO:0036293	301	5	0.56	+	9	0.000219	0.0306
mitral valve morphogenesis	GO:0003183	13	2	0.02	+	83.32	0.000256	0.0355
CD4-positive alpha-beta T cell activation	GO:0035710	68	3	0.13	+	23.89	0.000268	0.0368
mitral valve development	GO:0003174	14	2	0.03	+	77.37	0.000298	0.0406
cell population proliferation	GO:0008283	719	7	1.33	+	5.27	0.000303	0.0408
cardiac septum morphogenesis	GO:0060411	71	3	0.13	+	22.88	0.000304	0.0407
regulation of leukocyte differentiation	GO:1902105	324	5	0.6	+	8.36	0.000307	0.0408
response to oxygen levels	GO:0070482	327	5	0.6	+	8.28	0.000321	0.0422
positive regulation of cellular process	GO:0048522	5601	21	10.34	+	2.03	0.000326	0.0426
ventricular septum development	GO:0003281	73	3	0.13	+	22.26	0.00033	0.0427
atrial septum morphogenesis	GO:0060413	15	2	0.03	+	72.21	0.000343	0.044
negative regulation of androgen receptor signaling pathway	GO:0060766	15	2	0.03	+	72.21	0.000343	0.0436
alpha-beta T cell differentiation	GO:0046632	76	3	0.14	+	21.38	0.000372	0.0469
Analysis Type: PANTHER Overrepresentation Test (Released 20240226)
Annotation Version and Release Date: GO Ontology database DOI: 10.5281/zenodo.10536401 Released 2024-01-17
Analyzed List: upload_1 (Homo sapiens)
Reference List: Homo sapiens (all genes in database)
Test Type: FISHER
Correction: FDR

## Sheet: Supplementary Table 8
Supplementary Table 8: Associations of the 37 cFGR associated variants with quantitative hematological traits in Iceland under the additive model. Effects in SD are presented for the minor allele. P-value significance threshold is 0.05/(46 x 22) = 5.1E-05. Significant associations are highlighted (green, minor allele with positive effect, red minor allele with negative effect)
						HgF		RBC		Hg		Hct		MCV		MCH		MCHC		RBCDW		Platelet		Plateletcrit		MPV		WBC		Neutrophils		Eosinophils		Basophils		Monocytes		Lymphocytes		Iron		Transferrin		IBC		Ferritin		ESR
rsName	Position	gene or location	LD-Class	Amin/ Amaj	MAF	Effect	P	Effect	P	Effect	P	Effect	P	Effect	P	Effect	P	Effect	P	Effect	P	Effect	P	Effect	P	Effect	P	Effect	P	Effect	P	Effect	P	Effect	P	Effect	P	Effect	P	Effect	P	Effect	P	Effect	P	Effect	P	Effect	P
rs2360962	chr1:199035580	PTPRC	13	A/T	25.55	0.104	2.6355e-19	0.039	3.4096e-17	0.02	2.0328e-06	0.018	3.7202e-05	-0.039	6.6755e-18	-0.029	1.2889e-10	0.012	0.0077905	0.003	0.30107	-0.029	1.4782e-09	-0.049	3.6606e-23	-0.034	3.9964e-11	-0.001	0.78922	0.006	0.16249	0.023	2.1431e-07	0.019	4.0332e-06	0.004	0.33961	-0.012	0.0077226	-0.007	0.157	0.031	0.035467	0.001	0.87487	0.01	0.038919	-0.021	1.456e-05
rs3811444	chr1:247876149	TRIM58	1	T/C	34.243	0.082	7.409e-15	0.041	2.7351e-22	0.021	1.2372e-07	-0.006	0.14517	-0.077	1.2434e-76	-0.029	8.066e-13	0.093	3.4502e-115	-0.03	6.9076e-26	-0.037	4.8702e-17	-0.009	0.057063	0.052	1.6972e-28	0.023	2.9769e-08	0.016	3.086e-05	0.017	2.6436e-05	0.005	0.16596	0.012	0.004668	0.017	4.031e-05	-0.013	0.0063561	0.005	0.7183	-0.013	0.023884	0.01	0.038153	-0.009	0.061364
rs6730558	chr2:8616053	ID2	16	T/C	37.501	-0.1	2.5097e-22	0.022	7.7461e-08	0.004	0.25928	0.004	0.35598	-0.031	1.5405e-14	-0.026	5.6802e-11	0.004	0.29024	-0.033	2.8493e-32	0	0.98348	-0.005	0.30083	-0.01	0.034772	-0.007	0.092262	-0.006	0.13965	0.008	0.043886	-0.008	0.031073	-0.001	0.84313	-0.001	0.79544	-0.001	0.74392	0.018	0.16667	-0.007	0.20097	0.006	0.18622	0.034	6.515e-15
rs145917030, rs397803444	chr2:100168794	AFF3	111	TTGTG/!	35.994	0.088	3.1575e-17	-0.017	4.7983e-05	-0.009	0.026701	-0.008	0.049672	0.017	4.7579e-05	0.013	0.0010616	-0.005	0.17336	0	0.92615	0.002	0.66816	0.018	6.2957e-05	0.025	5.4844e-08	0.002	0.56842	0.002	0.70643	-0.004	0.26366	0.005	0.19331	0.002	0.67932	0.005	0.24156	0.004	0.41283	0.001	0.93787	0.007	0.22551	0	0.93205	-0.003	0.57255
rs1047891	chr2:210675783	CPS1	2	A/C	26.36	0.062	4.34e-08	-0.012	0.0098936	-0.002	0.67127	0	0.95714	0.02	5.2526e-06	0.014	0.0020158	-0.011	0.011473	0.005	0.12448	-0.022	2.801e-06	-0.014	0.0051404	0.027	9.4235e-08	-0.018	3.0898e-05	-0.02	1.5339e-06	0.014	0.0010916	0.005	0.2286	-0.019	3.1104e-05	-0.009	0.04511	-0.001	0.92499	0.007	0.64035	0.02	0.00087597	-0.003	0.48162	-0.011	0.021151
rs377468281	chr3:20061834	KAT2B	2	A/ATATAT	28.071	-0.069	6.424e-10	-0.016	0.00030934	-0.002	0.66408	-0.003	0.50413	0.025	1.8752e-08	0.024	3.1414e-08	0.003	0.4974	0.009	0.0023464	0.004	0.40343	0.009	0.070008	0.008	0.1245	0.004	0.39303	0.002	0.70325	-0.003	0.45587	0.002	0.65456	0.004	0.31474	0.004	0.40448	-0.009	0.063949	-0.024	0.092007	0.001	0.81727	-0.011	0.025737	0.012	0.013383
rs10529764	chr3:71208536	FOXP1	3	TTCTG/!	18.569	0.119	1.904e-20	0.024	2.8263e-06	0.013	0.0073761	0.013	0.0058755	-0.017	0.00053362	-0.015	0.0024698	0.002	0.62232	-0.007	0.042942	-0.015	0.0049261	-0.016	0.0027649	0.006	0.33081	0.002	0.73495	-0.002	0.70529	-0.013	0.0096552	-0.006	0.2019	0.006	0.25722	-0.004	0.44617	-0.008	0.19865	0.001	0.96977	0.005	0.51229	0.004	0.46549	-0.004	0.49856
rs6866330	chr5:3604638	IRX1	1	T/G	46.969	0.061	9.4527e-10	0.005	0.21036	0	0.9704	0.002	0.60593	-0.004	0.34548	-0.006	0.1019	-0.005	0.18014	0.001	0.8643	0.012	0.0031841	0.011	0.012341	-0.002	0.6452	0.001	0.78038	0	0.93359	0.005	0.21018	-0.002	0.48921	0.001	0.81973	0.005	0.19216	0.001	0.79721	0.021	0.092898	0.008	0.13325	0.005	0.20878	-0.001	0.78873
rs116239840	chr6:21722739	SOX4	43	C/A	16.386	-0.109	1.057e-15	-0.011	0.033609	-0.003	0.51929	-0.001	0.77629	0.018	0.00064788	0.011	0.032228	-0.01	0.05061	0.002	0.58089	0.003	0.59399	0.006	0.26876	0.001	0.81763	-0.01	0.051117	-0.007	0.1811	-0.005	0.34074	-0.001	0.76246	-0.005	0.33822	-0.003	0.57165	-0.009	0.13522	-0.02	0.26011	0.002	0.78585	-0.003	0.59635	0.012	0.04611
rs45553631	chr6:90271938	BACH2	60	T/C	35.008	0.122	2.4902e-31	-0.019	3.3572e-06	-0.005	0.1601	-0.007	0.080221	0.021	2.5049e-07	0.021	1.2904e-07	0.005	0.18128	0	0.94671	0.001	0.80164	-0.001	0.90153	-0.007	0.15715	-0.014	0.00073411	-0.011	0.0041494	-0.027	2.0571e-11	-0.012	0.0011685	0.005	0.26507	-0.004	0.38039	0.001	0.91219	0	0.97946	0	0.95479	0	0.95458	0.008	0.078144
rs35673155, rs397791674	chr6:109303091	CD164	109	!/CAA	47.008	-0.067	2.6843e-11	0.059	1.9812e-48	0.001	0.69684	0.016	9.4642e-06	-0.072	1.4631e-73	-0.082	6.129e-98	-0.045	2.9527e-31	0.037	9.411e-42	-0.019	4.6116e-06	-0.005	0.24063	0.025	3.296e-08	-0.018	5.1407e-06	-0.019	3.1635e-07	-0.016	2.482e-05	-0.024	1.7774e-11	-0.009	0.027576	0.005	0.20855	-0.01	0.02856	0.009	0.46996	0.008	0.12432	-0.017	8.0681e-05	-0.009	0.02885
rs668887	chr6:139514643	CITED2	9	G/A	3.33	0.302	5.5972e-27	-0.1	3.9951e-19	0	0.97437	0.002	0.81365	0.17	2.5299e-53	0.148	2.9025e-42	-0.007	0.50051	-0.012	0.11679	0.002	0.84863	0.011	0.34929	0.024	0.057755	0.011	0.30196	0.006	0.5853	0.006	0.5708	-0.003	0.76801	0.012	0.29749	0.005	0.61792	-0.01	0.44469	0.021	0.55208	0.009	0.5284	-0.034	0.0054243	0.03	0.013263
rs592423	chr6:139519556	CITED2	32	A/C	46.035	0.139	2.3713e-43	-0.041	1.8024e-24	0.013	0.00034328	0.012	0.00098263	0.089	1.2708e-110	0.084	2.5382e-101	0.01	0.0084991	0.002	0.42286	-0.007	0.088685	-0.006	0.18338	0.01	0.032321	0.009	0.017304	0.002	0.61564	0.007	0.090579	-0.001	0.85404	0.007	0.078538	0.017	2.4252e-05	0.007	0.11712	-0.012	0.34406	0.013	0.01811	-0.001	0.8664	0.003	0.48656
rs113757047	chr9:21301524	IFNA5	9	C/A	3.922	-0.16	3.1873e-10	0.015	0.15007	0	0.99145	-0.001	0.95077	-0.025	0.013312	-0.02	0.044995	0.007	0.45146	-0.003	0.70831	0.022	0.041027	0.012	0.25804	-0.001	0.94872	0.02	0.041725	0.029	0.0019845	0.001	0.91835	0.014	0.12055	0.015	0.14858	-0.01	0.30808	-0.01	0.4056	-0.05	0.11602	-0.016	0.22952	0.016	0.16081	0.005	0.64742
rs748303990	chr9:132989107	GFI1B	4	G/A	0.214	0.896	2.8377e-24	-0.165	0.00015879	-0.192	2.0971e-06	-0.111	0.005967	0.08	0.06426	-0.052	0.2241	-0.287	7.7331e-12	0.229	1.6136e-14	-0.496	1.6201e-27	0.074	0.1172	1.202	5.9285e-133	0.102	0.01633	0.122	0.0024898	-0.314	1.9161e-13	-0.154	7.1919e-05	0.077	0.080051	0.065	0.13448	-0.02	0.69647	-0.079	0.49996	-0.1	0.088261	-0.134	0.0052942	-0.051	0.26744
rs150813342	chr9:132989126	GFI1B	1	T/C	1.621	0.539	8.0192e-42	-0.007	0.64034	-0.024	0.092156	-0.007	0.64192	-0.002	0.88192	-0.033	0.032004	-0.067	9.9844e-06	-0.008	0.4434	-0.384	6.0029e-121	-0.158	1.0206e-20	0.462	7.6133e-152	-0.101	4.7019e-11	-0.088	1.0032e-09	-0.203	7.0183e-40	-0.17	2.6223e-34	-0.059	0.00019168	-0.036	0.023337	0.032	0.079809	-0.084	0.090883	-0.038	0.075527	0.037	0.030324	-0.013	0.42506
rs151127828	chr11:118335406	CD3D	4	A/G	1.595	-0.241	2.1402e-09	0.004	0.82118	-0.008	0.56936	-0.004	0.80749	-0.012	0.42957	-0.016	0.30618	-0.009	0.54289	0.015	0.16007	-0.008	0.61611	0.004	0.82428	0.001	0.93722	-0.004	0.78726	0.008	0.60003	0.015	0.31905	0.017	0.22242	0.025	0.11558	-0.012	0.43112	-0.011	0.52433	-0.075	0.14166	-0.046	0.025853	-0.002	0.91088	0.01	0.53406
rs79755767	chr12:54304624	NFE2	9	A/G	8.877	-0.13	1.4144e-13	0.03	2.1379e-05	0.026	5.3622e-05	0.031	1.4298e-06	-0.001	0.89805	-0.008	0.22477	-0.017	0.010515	-0.053	7.0416e-29	0.069	5.1144e-21	0.058	9.4552e-15	-0.025	0.0017989	0.007	0.26959	0.009	0.15217	-0.003	0.66429	0.026	3.6103e-05	0.006	0.38273	-0.007	0.28007	0.016	0.041506	-0.016	0.48698	-0.001	0.88506	-0.008	0.32406	0.001	0.9028
rs9938550	chr16:30987821	SETD1A, ORAI3	94	A/G	37.106	-0.063	1.9241e-09	-0.022	1.07e-07	-0.008	0.030806	-0.015	0.00010124	0.011	0.0094516	0.019	3.8377e-06	0.021	7.589e-08	0.001	0.64997	-0.004	0.40242	-0.004	0.43835	-0.001	0.78126	-0.013	0.00082711	-0.008	0.025165	-0.008	0.037187	0.001	0.85067	-0.008	0.045111	-0.015	0.00023866	-0.008	0.080695	-0.001	0.95809	0.002	0.68754	-0.01	0.025287	0.018	5.1939e-05
rs1415185611	chr16:67556702	CTCF	2	C/!	14.373	-0.109	2.7192e-14	0.02	0.00046227	0.016	0.001941	0.018	0.00087839	-0.008	0.15485	-0.009	0.12112	0	0.96729	0.008	0.034791	-0.005	0.45544	0.01	0.1196	0.026	4.9807e-05	-0.013	0.024618	-0.007	0.2067	0.015	0.0054093	0.005	0.35143	-0.016	0.00522	-0.018	0.0014486	-0.003	0.68397	0.022	0.22389	0.022	0.0038607	-0.022	0.00054099	-0.024	7.6958e-05
rs4782366	chr16:88457890	ZFPM1	14	C/T	38.696	-0.079	9.6575e-15	0.009	0.02495	0.007	0.078031	0.006	0.13545	-0.007	0.087544	-0.003	0.51876	0.007	0.08021	0.003	0.21372	-0.002	0.64937	-0.006	0.16834	-0.004	0.33344	0.017	1.449e-05	0.01	0.0053569	0.008	0.041034	0.019	2.0134e-07	0.013	0.0016185	0.009	0.023121	0.003	0.55962	0.007	0.58428	0.018	0.0012527	-0.008	0.09075	0.006	0.16012
rs74035509	chr16:88500925	ZFPM1	4	T/C	7.177	-0.205	1.5922e-26	0.019	0.016275	0.01	0.16344	0.017	0.018052	-0.006	0.40739	-0.012	0.09992	-0.015	0.042378	-0.009	0.070858	0.013	0.10767	0.006	0.45513	-0.022	0.009462	0.017	0.025458	0.02	0.0057887	-0.001	0.8406	0.02	0.0035943	0.021	0.0058136	-0.002	0.79288	-0.015	0.090787	-0.011	0.65387	-0.009	0.38121	0.01	0.22874	0.025	0.0019372
rs1233233269	chr16:88534223	ZFPM1	5	G/!	0.074	-1.143	1.7685e-15	0.287	7.1641e-05	0.177	0.007971	0.199	0.0029949	-0.11	0.12274	-0.138	0.05049	-0.055	0.431	-0.003	0.95404	-0.296	8.3607e-05	-0.336	1.3606e-05	-0.06	0.45279	0.164	0.020301	0.119	0.073166	-0.124	0.079207	0.117	0.06777	0.032	0.66186	0.232	0.0012653	0.197	0.01641	0.15	0.5201	-0.023	0.80697	0.195	0.013154	-0.061	0.41203
rs1459099	chr18:25941157	SS18	28	C/T	39.186	0.07	4.4666e-12	-0.006	0.11644	-0.002	0.58403	-0.003	0.47579	0.006	0.15335	0.006	0.10411	0.001	0.74519	-0.005	0.09808	0.003	0.41882	0.003	0.47936	-0.002	0.60201	0.003	0.39225	0.006	0.096346	0.004	0.34787	0.014	0.00011995	0.007	0.090657	-0.008	0.051664	-0.002	0.71666	-0.01	0.43725	-0.011	0.036315	0.002	0.70057	0	0.96907
rs9748585	chr18:54226083	MBD2	28	T/C	40.589	0.087	7.1314e-18	-0.003	0.44717	0.006	0.12237	0.004	0.29866	0.009	0.02988	0.012	0.0025885	0.008	0.029481	0.003	0.33464	-0.007	0.094419	-0.004	0.41587	0.003	0.5588	-0.002	0.54171	-0.001	0.7	-0.009	0.03001	-0.002	0.6716	-0.005	0.23563	0.004	0.33856	-0.002	0.69722	0.019	0.13752	0	0.93782	0	0.92849	0.005	0.23085
rs1281124736	chr19:4067023	ZBTB7A	2	T/C	0.049	1.72	1.9708e-24	0.541	2.1128e-09	0.086	0.30357	0.122	0.14392	-0.678	2.467e-14	-0.639	2.9632e-13	-0.124	0.15208	0.165	0.007477	-0.182	0.052688	0.019	0.84249	0.389	0.00012389	-0.302	0.00062177	-0.267	0.0011909	-0.043	0.62528	-0.108	0.17283	-0.318	0.00038908	-0.115	0.19738	-0.151	0.14233	-0.042	0.89623	0.202	0.094186	-0.165	0.092131	-0.328	0.00072653
rs59394312	chr19:4070165	ZBTB7A	44	G/C	16.554	0.094	2.3176e-12	0.043	1.3458e-15	0.012	0.016622	0.015	0.0033491	-0.049	2.4653e-20	-0.047	1.8465e-19	-0.007	0.15182	0.008	0.030256	-0.001	0.91047	-0.006	0.27318	-0.01	0.087538	-0.002	0.70294	-0.005	0.27562	0.014	0.0062279	0.001	0.83339	0.001	0.79889	0.007	0.19917	-0.015	0.013548	-0.036	0.037877	-0.011	0.11733	-0.008	0.19833	-0.021	0.00016731
rs11668886	chr19:4423422	CHAF1A	44	T/C	23.414	-0.094	1.8156e-15	0.018	0.00014598	-0.02	4.0531e-06	-0.019	9.7376e-06	-0.06	4.8268e-38	-0.056	7.6564e-35	-0.005	0.25211	0.011	0.00043778	0.001	0.85984	-0.008	0.13254	-0.016	0.0028336	-0.008	0.066129	-0.008	0.059973	-0.005	0.27008	-0.002	0.59865	-0.008	0.10382	-0.005	0.29185	0.009	0.080825	-0.013	0.40181	-0.003	0.58396	-0.006	0.24263	0.001	0.78284
rs11085824	chr19:12890733	GCDH,KLF1	59	G/A	40.4	-0.205	5.5e-52	-0.046	2.28e-30	-0.004	0.32	-0.016	2.3e-05	0.057	1.2e-45	0.068	6.8e-66	0.039	2.4e-23	-0.016	7.4e-09	0.007	0.09	0.005	0.23	-0.004	0.33	-0.007	0.066	-0.009	0.019	0	0.95	0.002	0.65	-0.01	0.017	0	0.94	0.005	0.32	0.001	0.92	-0.003	0.52	-0.011	0.016	-0.018	3.14e-05
rs2304098	chr19:19535463	GATAD2A	154	C/T	34.788	-0.079	7.4662e-14	-0.004	0.41128	-0.004	0.25057	-0.001	0.70816	0.007	0.11223	0.002	0.57733	-0.01	0.014987	-0.015	1.0728e-07	0.02	4.1454e-06	0.03	2.309e-11	0.015	0.0014253	-0.006	0.13915	-0.005	0.19927	0.015	0.00025659	0.012	0.0012875	0.003	0.46714	-0.007	0.11763	0.009	0.05916	0.004	0.76811	-0.017	0.0018219	0.009	0.039748	0.008	0.061993
rs78744187	chr19:33263642	CEBPA	1	T/C	9.929	-0.103	8.1841e-10	0.082	3.4674e-35	0.018	0.003375	0.028	5.87e-06	-0.099	1.664e-51	-0.098	2.4224e-52	-0.023	0.00025152	0.009	0.053516	-0.027	0.00012139	-0.024	0.00086168	0.006	0.41333	-0.016	0.015905	-0.008	0.183	0	0.96304	-0.201	2.1981e-255	-0.01	0.14546	-0.01	0.11974	-0.021	0.0049931	0.025	0.23482	0.007	0.4311	-0.014	0.058163	-0.031	1.366e-05
rs139946019	chr20:32240836	POFUT1	1	ATTATTTATTTAT/!	35.956	-0.087	2.9752e-17	0.012	0.0037753	0.005	0.20163	0.006	0.12149	-0.014	0.00085456	-0.012	0.0022642	0	0.97074	0.022	1.0928e-14	-0.002	0.69236	-0.007	0.12267	-0.006	0.16784	0.011	0.0046444	0.01	0.011751	-0.001	0.76382	-0.012	0.0013456	-0.022	5.5361e-08	0.011	0.0087061	-0.004	0.34968	-0.007	0.59538	-0.003	0.59399	0.002	0.60732	0.002	0.63568
rs562306828, rs61188026	chr20:45928576	PLTP	35	AAGAG/!	23.146	-0.074	3.6494e-10	-0.021	9.6157e-06	-0.007	0.087212	-0.009	0.030856	0.019	3.4962e-05	0.02	8.0239e-06	0.006	0.17392	0.007	0.029038	-0.011	0.028843	-0.014	0.0042205	-0.008	0.13929	0.007	0.10829	0.005	0.2626	0	0.94707	-0.002	0.64398	0.008	0.10304	-0.001	0.87841	-0.003	0.53444	0.014	0.36605	0.009	0.16856	0.002	0.66344	0.002	0.65348
rs1153291	chr21:29316749	BACH1	64	G/T	43.187	0.063	4.6739e-10	-0.002	0.61725	-0.008	0.030839	-0.006	0.097717	-0.005	0.22763	-0.007	0.067943	-0.007	0.055954	0.006	0.023082	0.01	0.01816	0.003	0.48965	-0.011	0.01074	-0.005	0.17999	-0.003	0.4972	0.002	0.6062	-0.007	0.053836	0.002	0.6183	-0.004	0.35736	-0.011	0.021576	0.011	0.38374	0.005	0.34337	-0.004	0.35428	0.012	0.0050113
rs1483815341	chr22:18555034	TMEM191B	1	A/G	2.801	0.236	4.1219e-13	-0.009	0.47321	-0.004	0.71374	0	0.9668	0.012	0.34765	0.006	0.62867	-0.011	0.38052	-0.003	0.75308	-0.003	0.79725	0.012	0.39157	0.015	0.28214	-0.011	0.3815	-0.011	0.31853	0.002	0.84711	0.007	0.51243	-0.005	0.67764	0	0.97734	-0.021	0.14033	0.002	0.95259	0.01	0.55775	-0.002	0.86002	-0.002	0.88688
rs5997982	chr22:21457702	HIC2	1	T/C	7.226	0.26	4.4292e-41	-0.018	0.01762	-0.002	0.78159	-0.006	0.38316	0.02	0.01016	0.022	0.0029196	0.012	0.095877	-0.009	0.085199	-0.01	0.19463	-0.002	0.79211	0.011	0.19975	-0.01	0.18638	-0.009	0.17943	-0.004	0.60044	-0.01	0.15722	-0.014	0.060545	0.001	0.94723	-0.004	0.6747	0.019	0.45741	0.003	0.73422	0.011	0.19765	-0.002	0.84057
rs1935799765	chrX:55021193	ALAS2	1	C/T	0.152	-0.84	6.7812e-09	0.331	6.5211e-07	-0.422	2.682e-13	-0.232	9.603e-05	-0.995	6.7931e-60	-1.17	5.2976e-84	-0.799	6.839e-39	0.273	1.165e-10	0.213	0.00089282	0.108	0.10336	-0.173	0.013789	0.099	0.099043	0.045	0.38152	0.057	0.3441	0.021	0.70446	-0.015	0.80807	0.073	0.24217	0.201	0.0047635	-0.062	0.7696	0.024	0.77133	-0.086	0.24368	-0.083	0.215

## Sheet: Supplementary Table 9
Supplementary table 8: Usage of five different transcription start sites (TSSs)(promoter 1-promoter 5) for ZBTB7A in variaous cell lines in the Fantom5 Promoter Atlas. The table shows the promoter peaks (representing TSSs) for all available cell lines . The main TSS, P1 is the annotated TSS in the UCSC browser.
EntrezGene:51341 - resource_browser
Sample	p1@ZBTB7A	p2@ZBTB7A	p3@ZBTB7A	p4@ZBTB7A	p5@ZBTB7A	Sum
acantholytic squamous carcinoma cell line:HCC1806.CNhs11844.10717-109I6	5.39	3.19	2.45	0.49	1.23	12.75
acute lymphoblastic leukemia (B-ALL) cell line:BALL-1.CNhs11251.10455-106G5	3.16	5.2	1.49	0	0.93	10.78
acute lymphoblastic leukemia (B-ALL) cell line:NALM-6.CNhs11282.10534-107G3	4.18	3.75	2.16	0.43	0.43	10.95
acute lymphoblastic leukemia (T-ALL) cell line:HPB-ALL.CNhs10746.10429-106D6	5.83	7.33	0.43	1.21	0.92	15.72
acute lymphoblastic leukemia (T-ALL) cell line:Jurkat.CNhs11253.10464-106H5	3.03	2.71	1.91	0.48	0.16	8.29
acute myeloid leukemia (FAB M0) cell line:Kasumi-3.CNhs13241.10789-110H6	4.6	1.53	2.3	0	0.38	8.81
acute myeloid leukemia (FAB M0) cell line:KG-1.CNhs13053.10827-111C8	3.59	3.59	0.6	0.6	2	10.38
acute myeloid leukemia (FAB M1) cell line:HYT-1.CNhs13054.10828-111C9	10.8	4.45	5.5	0.64	1.27	22.66
acute myeloid leukemia (FAB M2) cell line:Kasumi-1.CNhs13502.10788-110H5	7.47	1.95	3.57	0.32	0.65	13.96
acute myeloid leukemia (FAB M2) cell line:Kasumi-6.CNhs13052.10792-110H9	8.42	1.4	2.81	0.56	1.68	14.87
acute myeloid leukemia (FAB M2) cell line:NKM-1.CNhs11864.10765-110E9	13.69	5.25	1.37	0.23	0.91	21.45
acute myeloid leukemia (FAB M3) cell line:HL60.CNhs13055.10829-111D1	3.45	10.18	1.25	0.16	0.63	15.67
acute myeloid leukemia (FAB M4) cell line:FKH-1.CNhs13503.10830-111D2	30.08	2.51	5.01	0	0	37.6
acute myeloid leukemia (FAB M4) cell line:HNT-34.CNhs13504.10831-111D3	8.13	2.54	1.19	0.17	0.85	12.88
acute myeloid leukemia (FAB M4eo) cell line:EoL-1.CNhs13056.10832-111D4	11.24	7.55	1.12	1.93	1.12	22.96
acute myeloid leukemia (FAB M4eo) cell line:EoL-3.CNhs13057.10833-111D5	11.5	4.64	2.42	0.2	0.81	19.57
acute myeloid leukemia (FAB M5) cell line:NOMO-1.CNhs13050.10764-110E8	13.63	3.83	2.98	0	1.7	22.14
acute myeloid leukemia (FAB M5) cell line:P31/FUJ.CNhs13051.10770-110F5	10.99	1.03	0.34	0.69	0.69	13.74
acute myeloid leukemia (FAB M5) cell line:THP-1 (fresh).CNhs10722.10399-106A3	9.22	8.3	2.77	0.31	1.54	22.14
acute myeloid leukemia (FAB M5) cell line:THP-1 (revived).CNhs10723.10400-106A4	11.41	6.49	3.13	0.22	0.67	21.92
acute myeloid leukemia (FAB M5) cell line:THP-1 (thawed).CNhs10724.10405-106A9	10.34	6.01	2.84	0	0.33	19.52
acute myeloid leukemia (FAB M5) cell line:U-937 DE-4.CNhs13058.10834-111D6	2.93	4.1	1.37	0.39	0.39	9.18
acute myeloid leukemia (FAB M6) cell line:EEB.CNhs13059.10835-111D7	2.23	5.57	2.78	0.84	0.84	12.26
acute myeloid leukemia (FAB M6) cell line:F-36E.CNhs13060.10836-111D8	6.15	3.69	7.39	0	0	17.23
acute myeloid leukemia (FAB M6) cell line:F-36P.CNhs13505.10837-111D9	4.6	0.81	4.33	0	0	9.74
acute myeloid leukemia (FAB M7) cell line:MKPL-1.CNhs11888.10802-111A1	7.05	2.82	15.51	0	1.41	26.79
acute myeloid leukemia (FAB M7) cell line:M-MOK.CNhs13049.10699-109G6	2	2.66	0.67	0.67	3	9
adenocarcinoma cell line:IM95m.CNhs11882.10796-110I4	18.53	13.66	2.06	0.94	1.5	36.69
Adipocyte - breast, donor1.CNhs11051.11376-118A8	0	0	0	0	0	0
Adipocyte - breast, donor2.CNhs11969.11327-117E4	9.21	11.56	2.14	2.14	1.28	26.33
Adipocyte - omental, donor1.CNhs11054.11473-119C6	7.61	9.3	0.56	1.55	1.41	20.43
Adipocyte - omental, donor2.CNhs12067.11474-119C7	10.01	9.01	6	4	2	31.02
Adipocyte - omental, donor3.CNhs12068.11475-119C8	8.49	14.3	1.79	1.79	1.79	28.16
Adipocyte - perirenal, donor1.CNhs12069.11476-119C9	5.23	12.21	0.87	2.62	0.87	21.8
Adipocyte - subcutaneous, donor1.CNhs12494.11259-116F8	0	5.07	0	0	0	5.07
Adipocyte - subcutaneous, donor2.CNhs11371.11336-117F4	8.84	10.11	1.26	1.26	0.63	22.1
Adipocyte - subcutaneous, donor3.CNhs12017.11408-118E4	7.84	14.37	0	3.13	1.04	26.38
adipose tissue, adult, pool1.CNhs10615.10010-101C1	15.82	12.31	1.32	2.05	0.88	32.38
adrenal cortex adenocarcinoma cell line:SW-13.CNhs11893.10810-111A9	2.06	7.65	0.12	0.97	0.49	11.29
adult T-cell leukemia cell line:ATN-1.CNhs10738.10421-106C7	11.7	12.59	1.45	2.12	0.56	28.42
alveolar cell carcinoma cell line:SW 1573.CNhs11838.10708-109H6	5.11	13.35	0	2.84	0.28	21.58
Alveolar Epithelial Cells, donor1.CNhs11325.11510-119G7	9.83	7.37	2.7	1.47	0.49	21.86
Alveolar Epithelial Cells, donor2.CNhs12084.11590-120G6	13.26	27.21	6.28	4.19	0.7	51.64
Amniotic Epithelial Cells, donor1.CNhs11341.11533-120A3	13.11	8.3	0.22	0.22	0.66	22.51
Amniotic Epithelial Cells, donor3.CNhs12125.11694-123A2	20.31	7.65	3.17	1.06	0	32.19
amniotic membrane cells, donor1.CNhs12502.12235-129G3	25.31	18.38	2.63	1.43	0.72	48.47
amniotic membrane cells, donor2.CNhs12503.12236-129G4	15.74	7.13	3.86	1.19	0	27.92
amniotic membrane cells, donor3.CNhs12379.12237-129G5	21.81	23.96	6.14	0.31	0	52.22
amygdala - adult, donor10196.CNhs13793.10167-103B5	3.98	7.95	0.99	8.95	1.99	23.86
amygdala, adult, donor10252.CNhs12311.10151-102I7	7.88	10.27	2.39	10.83	1.41	32.78
anaplastic carcinoma cell line:8305C.CNhs10745.10428-106D5	9.46	5.79	1.34	0.22	0.67	17.48
anaplastic large cell lymphoma cell line:Ki-JK.CNhs11881.10795-110I3	4.12	13.84	1.81	1.81	0.16	21.74
anaplastic squamous cell carcinoma cell line:RPMI 2650.CNhs11889.10805-111A4	2.74	7.18	0.42	2.74	0.63	13.71
Anulus Pulposus Cell, donor1.CNhs10876.11248-116E6	8.91	4.46	1.24	0.5	0.25	15.36
Anulus Pulposus Cell, donor2.CNhs12064.11463-119B5	10.6	9.94	3.98	1.66	0	26.18
aorta, adult, pool1.CNhs11760.10052-101G7	22.52	12.75	3.39	2.19	1.39	42.24
Aortic smooth muscle cell response to FGF2, 00hr00min, biol_rep1 (LK1).CNhs13339.12642-134G5	5.38	2.69	0.67	0.67	0	9.41
Aortic smooth muscle cell response to FGF2, 00hr00min, biol_rep2 (LK2).CNhs13358.12740-135I4	7.23	4.22	0.6	0.6	0	12.65
Aortic smooth muscle cell response to IL1b, 00hr00min, biol_rep1 (LK31).CNhs13349.12652-134H6	5.84	2.92	0	0	0.73	9.49
Aortic smooth muscle cell response to IL1b, 00hr00min, biol_rep2 (LK32).CNhs13369.12750-136A5	7.32	7.81	1.46	0.49	0	17.08
appendix, adult.CNhs12842.10189-103D9	17.96	12.99	3.04	1.11	1.38	36.48
argyrophil small cell carcinoma cell line:TC-YIK.CNhs11725.10589-108D4	3.28	3.28	0	0.5	0.25	7.31
Astrocyte - cerebellum, donor1.CNhs11321.11500-119F6	5.05	4.92	0.49	1.11	0.37	11.94
Astrocyte - cerebellum, donor2.CNhs12081.11580-120F5	8.77	5.3	0.82	2.24	1.02	18.15
Astrocyte - cerebellum, donor3.CNhs12117.11661-122F5	5.02	5.33	0.94	2.82	0.63	14.74
Astrocyte - cerebral cortex, donor1.CNhs10864.11235-116D2	3.43	1.43	0	2.86	0.29	8.01
Astrocyte - cerebral cortex, donor2.CNhs11960.11316-117D2	3.56	3.83	0.82	1.37	0.55	10.13
Astrocyte - cerebral cortex, donor3.CNhs12005.11392-118C6	3.64	4.39	1.13	1.63	0.25	11.04
astrocytoma cell line:TM-31.CNhs10742.10425-106D2	5.42	1.43	1.33	1.12	0.61	9.91
b cell line:RPMI1788.CNhs10744.10427-106D4	3.32	7.14	0.49	0.25	0.37	11.57
B lymphoblastoid cell line: GM12878 ENCODE, biol_rep1.CNhs12331.10821-111C2	6.27	17.42	1.07	0.69	0.23	25.68
B lymphoblastoid cell line: GM12878 ENCODE, biol_rep2.CNhs12332.10822-111C3	5.66	20.77	0.74	0	0.33	27.5
B lymphoblastoid cell line: GM12878 ENCODE, biol_rep3.CNhs12333.10823-111C4	5.82	17.32	0.55	0.55	0.39	24.63
basal cell carcinoma cell line:TE 354.T.CNhs11932.10702-109G9	9.95	6.22	3.42	0.62	0.31	20.52
Basophils, donor1.CNhs12546.12241-129G9	33.83	15.73	5.51	0.79	3.93	59.79
Basophils, donor2.CNhs12563.12242-129H1	22.65	12.28	3.07	0.77	0.77	39.54
Basophils, donor3.CNhs12575.12243-129H2	25.85	21.52	3.72	1.24	4.03	56.36
bile duct carcinoma cell line:HuCCT1.CNhs10750.10432-106D9	7.37	13.12	1.08	0.9	0.36	22.83
bile duct carcinoma cell line:TFK-1.CNhs11265.10496-107C1	2.51	17.9	0.36	0.54	0.18	21.49
biphenotypic B myelomonocytic leukemia cell line:MV-4-11.CNhs11845.10718-109I7	17.39	7.16	4.6	1.02	2.05	32.22
bladder, adult, pool1.CNhs10616.10011-101C2	21.8	10.65	4.54	0.89	1.58	39.46
blood, adult, pool1.CNhs11761.10053-101G8	19.16	16.76	7.18	0	0	43.1
bone marrow stromal cell line:StromaNKtert.CNhs11931.10686-109F2	8.89	7.78	4.45	1.11	0	22.23
brain, adult, donor1.CNhs11796.10084-102B3	15.51	8.72	2.91	12.6	2.91	42.65
brain, adult, pool1.CNhs10617.10012-101C3	11.97	9.83	2.32	10.95	8.16	43.23
brain, fetal, pool1.CNhs11797.10085-102B4	2	2	2	0	0	6
breast carcinoma cell line:MCF7.CNhs11943.10482-107A5	4.69	10.68	4.95	0.78	1.04	22.14
breast carcinoma cell line:MDA-MB-453.CNhs10736.10419-106C5	7.78	18.02	2.8	1.75	1.31	31.66
breast, adult, donor1.CNhs11792.10080-102A8	12.32	16.67	2.9	1.45	1.45	34.79
Bronchial Epithelial Cell, donor4.CNhs12054.11453-119A4	6.44	12.87	0	1.84	0	21.15
Bronchial Epithelial Cell, donor5.CNhs12058.11457-119A8	11.45	31.93	2.11	0.6	0.9	46.99
Bronchial Epithelial Cell, donor6.CNhs12062.11461-119B3	10.72	25.88	6.29	0.37	0	43.26
bronchial squamous cell carcinoma cell line:KNS-62.CNhs11862.10760-110E4	3.98	16.39	1.02	0.68	0	22.07
bronchioalveolar carcinoma cell line:NCI-H358.CNhs11840.10709-109H7	2.8	6.36	0.51	0.51	0	10.18
bronchogenic carcinoma cell line:ChaGo-K-1.CNhs11841.10710-109H8	1.89	6.38	0.47	0.47	0.71	9.92
Burkitt's lymphoma cell line:DAUDI.CNhs10739.10422-106C8	7.75	2.32	0.46	0.54	1.24	12.31
Burkitt's lymphoma cell line:RAJI.CNhs11268.10476-106I8	3.41	4.83	0.57	0.57	0.85	10.23
carcinoid cell line:NCI-H1770.CNhs11834.10703-109H1	2.41	3.1	1.72	0.69	0	7.92
carcinoid cell line:SK-PN-DW.CNhs11846.10719-109I8	2.33	6.12	1.17	1.46	0	11.08
carcinosarcoma cell line:JHUCS-1.CNhs11747.10642-109A3	2.26	2.95	0.35	1.22	0.17	6.95
Cardiac Myocyte, donor1.CNhs12341.11525-119I4	17.07	14.63	14.63	0	0	46.33
Cardiac Myocyte, donor2.CNhs12350.11605-120I3	7.38	3.35	1.34	0	0	12.07
Cardiac Myocyte, donor3.CNhs12571.11686-122I3	4.09	3.2	1.28	0.51	0.38	9.46
caudate nucleus - adult, donor10196.CNhs13802.10177-103C6	15.06	4.43	1.77	7.97	0	29.23
caudate nucleus, adult, donor10252.CNhs12321.10164-103B2	8.92	3.38	4.58	8.44	1.09	26.41
CD133+ stem cells - adult bone marrow derived, pool1.CNhs12552.12224-129F1	5.58	3.23	0.59	0.88	0.88	11.16
CD14+ monocyte derived endothelial progenitor cells, donor1.CNhs10858.11229-116C5	22.17	3.58	2.91	1.57	0.22	30.45
CD14+ monocyte derived endothelial progenitor cells, donor2.CNhs11897.11310-117C5	17.81	6.48	1.94	1.3	1.3	28.83
CD14+ monocyte derived endothelial progenitor cells, donor3.CNhs11904.11386-118B9	19.06	5.41	2.83	2.83	0	30.13
CD14+ monocytes - mock treated, donor1.CNhs13468.11863-125A9	30.39	35.48	22.1	1.02	1.16	90.15
CD14+ monocytes - mock treated, donor2.CNhs13484.11873-125C1	23.43	34.39	17	1.89	0.38	77.09
CD14+ monocytes - mock treated, donor3.CNhs13491.11883-125D2	26.2	34.69	19.41	0.73	0.24	81.27
CD14+ monocytes - treated with BCG, donor1.CNhs13465.11860-125A6	9.21	37.11	2.59	0.86	0	49.77
CD14+ monocytes - treated with BCG, donor2.CNhs13475.11870-125B7	10.25	35.35	2.82	1.54	0.77	50.73
CD14+ monocytes - treated with BCG, donor3.CNhs13543.11880-125C8	5.2	23.65	2.6	1.18	0.47	33.1
CD14+ monocytes - treated with B-glucan, donor1.CNhs13474.11869-125B6	20.92	45.79	8.83	1.63	0.7	77.87
CD14+ monocytes - treated with B-glucan, donor2.CNhs13489.11879-125C7	15.21	48.11	11.1	0.82	1.64	76.88
CD14+ monocytes - treated with B-glucan, donor3.CNhs13495.11889-125D8	13.94	43.98	6.5	0.93	0.31	65.66
CD14+ monocytes - treated with Candida, donor1.CNhs13473.11868-125B5	9.65	34.13	3.79	1.38	0	48.95
CD14+ monocytes - treated with Candida, donor2.CNhs13488.11878-125C6	12.91	34.86	2.58	0.65	2.58	53.58
CD14+ monocytes - treated with Candida, donor3.CNhs13494.11888-125D7	20.31	18.96	5.42	0	0	44.69
CD14+ monocytes - treated with Cryptococcus, donor1.CNhs13472.11867-125B4	30.68	39.34	11.11	0.94	0.56	82.63
CD14+ monocytes - treated with Cryptococcus, donor2.CNhs13487.11877-125C5	16.92	43.94	7.64	1.36	0.27	70.13
CD14+ monocytes - treated with Cryptococcus, donor3.CNhs13546.11887-125D6	12.58	24.49	4.27	0.67	0.22	42.23
CD14+ monocytes - treated with Group A streptococci, donor1.CNhs13469.11864-125B1	13.16	43.16	3.37	1.84	0.31	61.84
CD14+ monocytes - treated with Group A streptococci, donor2.CNhs13532.11874-125C2	9.95	35.3	4.17	1.6	0.32	51.34
CD14+ monocytes - treated with Group A streptococci, donor3.CNhs13492.11884-125D3	9.59	26.85	1.28	0.64	0	38.36
CD14+ monocytes - treated with IFN + N-hexane, donor1.CNhs13466.11861-125A7	16.16	30.68	5.28	0.99	0.33	53.44
CD14+ monocytes - treated with IFN + N-hexane, donor2.CNhs13476.11871-125B8	14.76	38.7	5.39	1	0.4	60.25
CD14+ monocytes - treated with IFN + N-hexane, donor3.CNhs13490.11881-125C9	11.08	27.28	4.69	0.43	0.43	43.91
CD14+ monocytes - treated with lipopolysaccharide, donor1.CNhs13470.11865-125B2	11.5	49.64	1.82	3.03	0	65.99
CD14+ monocytes - treated with lipopolysaccharide, donor2.CNhs13533.11875-125C3	9.21	32.78	1.84	1.47	0	45.3
CD14+ monocytes - treated with lipopolysaccharide, donor3.CNhs13545.11885-125D4	9.18	25.63	1.27	0.95	0.32	37.35
CD14+ monocytes - treated with Salmonella, donor1.CNhs13471.11866-125B3	6.97	47.59	2.03	2.03	0	58.62
CD14+ monocytes - treated with Salmonella, donor2.CNhs13485.11876-125C4	10.21	47.09	1.7	2.27	0	61.27
CD14+ monocytes - treated with Salmonella, donor3.CNhs13493.11886-125D5	8.1	44.22	1.25	1.25	0	54.82
CD14+ monocytes - treated with Trehalose dimycolate (TDM), donor1.CNhs13467.11862-125A8	14.82	33.67	5.02	1.26	1.26	56.03
CD14+ monocytes - treated with Trehalose dimycolate (TDM), donor2.CNhs13483.11872-125B9	14.6	35.46	4.69	2.61	1.04	58.4
CD14+ monocytes - treated with Trehalose dimycolate (TDM), donor3.CNhs13544.11882-125D1	11.29	19.55	2.82	1.3	0.22	35.18
CD14+ Monocytes, donor1.CNhs10852.11224-116B9	22.71	23.27	1.66	2.22	3.32	53.18
CD14+ Monocytes, donor2.CNhs11954.11305-117B9	32.49	33.89	5.41	2.21	2.61	76.61
CD14+ Monocytes, donor3.CNhs11997.11381-118B4	29.08	27.56	6.29	0.87	3.47	67.27
CD14+CD16- Monocytes, donor1.CNhs13224.11788-124B6	16.06	9.55	2.7	0.56	0	28.87
CD14+CD16- Monocytes, donor2.CNhs13216.11799-124C8	15.62	9.16	2.85	0.9	0.9	29.43
CD14+CD16- Monocytes, donor3.CNhs13540.11910-125G2	13.98	7.71	3.05	0.8	0.16	25.7
CD14+CD16+ Monocytes, donor1.CNhs13541.11789-124B7	20.28	8.87	6.34	0.21	0.42	36.12
CD14+CD16+ Monocytes, donor2.CNhs13208.11801-124D1	30.62	14.46	7.65	1.06	1.28	55.07
CD14+CD16+ Monocytes, donor3.CNhs13549.11912-125G4	16.77	7.55	6.08	0.84	0.42	31.66
CD14-CD16+ Monocytes, donor1.CNhs13229.11790-124B8	27.65	25.94	3.14	0.29	1.14	58.16
CD14-CD16+ Monocytes, donor2.CNhs13207.11800-124C9	29.44	19.1	7.76	0.2	0.8	57.3
CD14-CD16+ Monocytes, donor3.CNhs13548.11911-125G3	26.49	15.16	5.85	0.37	1.1	48.97
CD19+ B Cells (pluriselect), donor090309, donation1.CNhs12177.12189-129B2	10.56	14.08	0	0	1.76	26.4
CD19+ B Cells (pluriselect), donor090309, donation2.CNhs12179.12194-129B7	16.93	6.01	1.09	1.64	0.55	26.22
CD19+ B Cells (pluriselect), donor090309, donation3.CNhs12181.12199-129C3	9.78	5.34	0	1.78	0.89	17.79
CD19+ B Cells (pluriselect), donor090325, donation1.CNhs12531.12151-128F9	23.04	10.67	2.13	1.71	0	37.55
CD19+ B Cells (pluriselect), donor090325, donation2.CNhs12175.12174-128I5	13.21	7.21	2	0.8	0.8	24.02
CD19+ B Cells (pluriselect), donor090612, donation1.CNhs12183.12204-129C8	11.5	5.17	4.02	1.72	0.57	22.98
CD19+ B Cells (pluriselect), donor090612, donation2.CNhs12185.12209-129D4	13.22	5.29	3.31	2.64	0	24.46
CD19+ B Cells (pluriselect), donor090612, donation3.CNhs12188.12214-129D9	12.4	6.68	4.77	0.95	0.95	25.75
CD19+ B Cells, donor1.CNhs12343.11544-120B5	18.78	16.51	0.57	1.14	1.14	38.14
CD19+ B Cells, donor2.CNhs12352.11624-122B4	18.79	12.92	2.35	1.17	1.76	36.99
CD19+ B Cells, donor3.CNhs12354.11705-123B4	14.91	13.38	2.68	0	0.76	31.73
CD34+ Progenitors, donor1.CNhs13227.11545-120B6	17.18	3.97	0	0	0	21.15
CD34+ Progenitors, donor2.CNhs12205.11625-122B5	7.85	17.38	1.12	0	0.56	26.91
CD34+ stem cells - adult bone marrow derived, donor1, tech_rep1.CNhs12588.12225-129F2	7.11	3.42	2.37	1.32	0.53	14.75
CD4+ T Cells, donor1.CNhs10853.11225-116C1	20.06	3.34	2.95	0.39	1.38	28.12
CD4+ T Cells, donor2.CNhs11955.11306-117C1	20.44	4.32	1.57	0.79	1.57	28.69
CD4+ T Cells, donor3.CNhs11998.11382-118B5	28.17	4.11	2.06	0.41	0.82	35.57
CD4+CD25+CD45RA- memory regulatory T cells expanded, donor1.CNhs13204.11794-124C3	17.94	3.01	3.68	0.11	0.78	25.52
CD4+CD25+CD45RA- memory regulatory T cells expanded, donor2.CNhs13811.11916-125G8	20.88	4.87	3.71	0.51	0.51	30.48
CD4+CD25+CD45RA- memory regulatory T cells expanded, donor3.CNhs13812.11920-125H3	17.43	4.42	3.51	0.52	0.78	26.66
CD4+CD25+CD45RA- memory regulatory T cells, donor1.CNhs13195.11782-124A9	20.03	2.95	1.18	0.29	0.29	24.74
CD4+CD25+CD45RA- memory regulatory T cells, donor2.CNhs13206.11797-124C6	20.82	1.33	2.66	0.89	0.66	26.36
CD4+CD25+CD45RA- memory regulatory T cells, donor3.CNhs13538.11908-125F9	21.12	2.17	1.9	0	0.81	26
CD4+CD25+CD45RA+ naive regulatory T cells expanded, donor1.CNhs13203.11793-124C2	22.07	0.84	2.17	0.17	0.33	25.58
CD4+CD25+CD45RA+ naive regulatory T cells, donor1.CNhs13238.11780-124A7	19.56	3.59	3.26	0.33	0.33	27.07
CD4+CD25+CD45RA+ naive regulatory T cells, donor2.CNhs13235.11796-124C5	12.78	2.37	1.89	0	0.95	17.99
CD4+CD25+CD45RA+ naive regulatory T cells, donor3.CNhs13513.11907-125F8	17.53	7.79	1.95	1.95	1.95	31.17
CD4+CD25-CD45RA- memory conventional T cells expanded, donor1.CNhs13215.11792-124C1	18.13	2.38	2.27	0.57	0.68	24.03
CD4+CD25-CD45RA- memory conventional T cells, donor1.CNhs13239.11786-124B4	16.86	3.83	0.77	0.77	0.38	22.61
CD4+CD25-CD45RA- memory conventional T cells, donor2.CNhs13237.11798-124C7	16.84	1.03	1.72	0.69	0.69	20.97
CD4+CD25-CD45RA- memory conventional T cells, donor3.CNhs13539.11909-125G1	15.43	1.77	2.53	0.51	0.76	21
CD4+CD25-CD45RA+ naive conventional T cells expanded, donor1.CNhs13202.11791-124B9	18.26	1.16	2.61	0.58	0	22.61
CD4+CD25-CD45RA+ naive conventional T cells expanded, donor2.CNhs13813.11913-125G5	12.33	3.29	3.45	1.15	0.33	20.55
CD4+CD25-CD45RA+ naive conventional T cells expanded, donor3.CNhs13814.11917-125G9	10.78	1.93	4.42	0.28	0.83	18.24
CD4+CD25-CD45RA+ naive conventional T cells, donor1.CNhs13223.11784-124B2	15.87	0.59	1.63	0.3	0.74	19.13
CD4+CD25-CD45RA+ naive conventional T cells, donor2.CNhs13205.11795-124C4	12.04	1.07	1.07	1.07	0.27	15.52
CD4+CD25-CD45RA+ naive conventional T cells, donor3.CNhs13512.11906-125F7	15.68	1.05	2.09	1.05	0	19.87
CD8+ T Cells (pluriselect), donor090309, donation1.CNhs12176.12186-129A8	12.11	2.87	3.5	1.59	0.32	20.39
CD8+ T Cells (pluriselect), donor090309, donation2.CNhs12178.12191-129B4	15.63	5.86	3.26	0.65	0	25.4
CD8+ T Cells (pluriselect), donor090309, donation3.CNhs12180.12196-129B9	11.41	3.8	2.85	0	0.95	19.01
CD8+ T Cells (pluriselect), donor090325, donation1.CNhs12201.12148-128F6	18.52	6.17	4.07	0.6	1.2	30.56
CD8+ T Cells (pluriselect), donor090325, donation2.CNhs12199.12171-128I2	19.84	3.97	4.35	0.38	0.51	29.05
CD8+ T Cells (pluriselect), donor090612, donation1.CNhs12182.12201-129C5	16.24	12.49	1.25	0	0	29.98
CD8+ T Cells (pluriselect), donor090612, donation2.CNhs12184.12206-129D1	18.71	7.58	2.84	0.71	0.24	30.08
CD8+ T Cells (pluriselect), donor090612, donation3.CNhs12187.12211-129D6	14.78	7.39	3.28	1.64	0	27.09
CD8+ T Cells, donor1.CNhs10854.11226-116C2	29.23	16.53	2.02	0.2	2.82	50.8
CD8+ T Cells, donor2.CNhs11956.11307-117C2	36.1	18.45	3.74	0.53	2.94	61.76
CD8+ T Cells, donor3.CNhs11999.11383-118B6	30.41	13.47	2.75	0.43	0.87	47.93
cerebellum - adult, donor10196.CNhs13799.10173-103C2	9.15	3.05	0	4.58	0	16.78
cerebellum, adult, donor10252.CNhs12323.10166-103B4	15.92	3.43	1.77	8.51	3.98	33.61
cerebellum, adult, pool1.CNhs11795.10083-102B2	17.14	6.5	2.36	13.3	3.55	42.85
cerebral meninges, adult.CNhs12840.10188-103D8	7.02	10.53	1.54	8.56	4.17	31.82
cervical cancer cell line:D98-AH2.CNhs11288.10552-107I3	2.4	7.41	0.65	0.87	0.98	12.31
cervical cancer cell line:ME-180.CNhs11289.10553-107I4	15.2	6.41	2.23	0.56	0.42	24.82
cervix, adult, pool1.CNhs10618.10013-101C4	19.16	12.24	2.15	3.23	1	37.78
cholangiocellular carcinoma cell line:HuH-28.CNhs11283.10536-107G5	6.84	6.04	2.62	1.14	0.34	16.98
Chondrocyte - de diff, donor1.CNhs11923.11261-116G1	11.93	4.34	1.81	1.08	0.36	19.52
Chondrocyte - de diff, donor2.CNhs11372.11338-117F6	17.05	6.52	5.51	1	0	30.08
Chondrocyte - de diff, donor3.CNhs12020.11410-118E6	12.31	4.92	2.61	1.88	0.29	22.01
Chondrocyte - re diff, donor2.CNhs11373.11339-117F7	8.75	7.16	0	0	0	15.91
Chondrocyte - re diff, donor3.CNhs12021.11411-118E7	15.09	12.65	3.41	2.43	0.49	34.07
choriocarcinoma cell line:BeWo.CNhs10740.10423-106C9	1.26	6.46	0.18	0.36	0.9	9.16
choriocarcinoma cell line:SCH.CNhs11875.10785-110H2	0.76	6.41	0.65	0.43	0.22	8.47
choriocarcinoma cell line:T3M-3.CNhs11820.10618-108G6	2.08	8.99	0.23	0.46	0.46	12.22
chorionic membrane cells, donor1.CNhs12504.12238-129G6	11.17	7.02	1.28	0.64	0	20.11
chorionic membrane cells, donor2.CNhs12506.12239-129G7	12	7.69	2.38	1.47	0.92	24.46
chorionic membrane cells, donor3.CNhs12380.12240-129G8	9.59	4.26	1.07	1.07	0	15.99
chronic lymphocytic leukemia (T-CLL) cell line:SKW-3.CNhs11714.10416-106C2	4.09	2.04	0	3.07	0	9.2
chronic myeloblastic leukemia (CML) cell line:KCL-22.CNhs11886.10801-110I9	4.24	8.16	1.88	0.16	2.04	16.48
chronic myelogenous leukemia (CML) cell line:MEG-A2.CNhs11865.10766-110F1	7.31	2.83	6.32	0.17	1.5	18.13
chronic myelogenous leukemia cell line:K562 ENCODE, biol_rep1.CNhs12334.10824-111C5	4.51	4.74	2.03	0	0.9	12.18
chronic myelogenous leukemia cell line:K562 ENCODE, biol_rep2.CNhs12335.10825-111C6	6.27	5.88	1.96	0.39	0	14.5
chronic myelogenous leukemia cell line:K562 ENCODE, biol_rep3.CNhs12336.10826-111C7	6.88	4.2	1.34	0	0.5	12.92
chronic myelogenous leukemia cell line:K562.CNhs11250.10454-106G4	5.69	5.31	1.14	0.19	0.19	12.52
chronic myelogenous leukemia cell line:KU812.CNhs10727.10409-106B4	16.37	3.66	12.71	0.79	2.38	35.91
Ciliary Epithelial Cells, donor1.CNhs10871.11242-116D9	3.31	4.54	0.38	1.99	0.28	10.5
Ciliary Epithelial Cells, donor2.CNhs11966.11323-117D9	4.43	4.21	0.22	1.77	0.22	10.85
Ciliary Epithelial Cells, donor3.CNhs12009.11399-118D4	4.22	4.48	0.35	1.32	0.18	10.55
clear cell carcinoma cell line:JHOC-5.CNhs11745.10638-108I8	2.74	3.38	0.84	0.21	0.21	7.38
clear cell carcinoma cell line:TEN.CNhs11930.10636-108I6	4.08	9.96	1.14	1.14	0.16	16.48
Clontech Human Universal Reference Total RNA, pool1.CNhs10608.10000-101A1	11.85	6.68	2.1	2.82	1.77	25.22
colon carcinoma cell line:CACO-2.CNhs11280.10513-107D9	1.27	3.25	0.14	0.42	0	5.08
colon carcinoma cell line:COLO-320.CNhs10737.10420-106C6	1.08	4.11	0.22	1.08	0.43	6.92
colon, adult, donor1.CNhs11794.10082-102B1	39.81	19.91	13.93	2.99	3.98	80.62
colon, adult, pool1.CNhs10619.10014-101C5	23.88	15.21	6.99	1.86	1.86	49.8
colon, fetal, donor1.CNhs11780.10070-101I7	18.94	14.05	10.39	0	0	43.38
cord blood derived cell line:COBL-a 24h infection(-C).CNhs11049.10452-106G2	2.37	8.01	2.97	1.19	0.89	15.43
cord blood derived cell line:COBL-a 24h infection.CNhs11050.10453-106G3	5.31	5.93	1.36	0.86	0.74	14.2
cord blood derived cell line:COBL-a untreated.CNhs11045.10449-106F8	5.33	8.14	1.46	0.31	0.84	16.08
Corneal Epithelial Cells, donor1.CNhs11336.11526-119I5	17.12	33.52	2.19	1.46	1.09	55.38
Corneal Epithelial Cells, donor3.CNhs12123.11687-122I4	10.75	28.92	1.11	0.74	1.85	43.37
corpus callosum, adult, pool1.CNhs10649.10042-101F6	13.75	10.58	4.18	4.45	1.75	34.71
Dendritic Cells - monocyte immature derived, donor1, tech_rep1.CNhs10855.11227-116C3	23.37	6.82	6.49	0.97	0	37.65
Dendritic Cells - monocyte immature derived, donor1, tech_rep2.CNhs11062.11227-116C3	25.07	6.62	8.36	0.17	0.17	40.39
Dendritic Cells - monocyte immature derived, donor3.CNhs12000.11384-118B7	18.22	8.64	6.65	0.93	0.13	34.57
Dendritic Cells - plasmacytoid, donor1.CNhs10857.11228-116C4	23.85	10.97	1.19	0.48	0.48	36.97
Dendritic Cells - plasmacytoid, donor2.CNhs12196.11309-117C4	17.73	8.01	0	0.57	1.14	27.45
Dendritic Cells - plasmacytoid, donor3.CNhs12200.11385-118B8	21.92	11.14	0.37	0.74	0.37	34.54
diaphragm, fetal, donor1.CNhs11779.10069-101I6	9.63	5.62	0.8	0.8	3.21	20.06
diencephalon, adult.CNhs12610.10193-103E4	11.48	7.03	2.11	6.33	1.41	28.36
diffuse large B-cell lymphoma cell line:CTB-1.CNhs11741.10631-108I1	8.03	6.02	0	0.36	0.91	15.32
ductal cell carcinoma cell line:KLM-1.CNhs11100.10438-106E6	4.11	7.04	1.17	0	0.59	12.91
ductal cell carcinoma cell line:MIA Paca2.CNhs11259.10488-107B2	4.86	8.5	1.7	1.46	0.24	16.76
ductus deferens, adult.CNhs12846.10196-103E7	19.73	5.52	10.65	1.97	0.79	38.66
duodenum, fetal, donor1, tech_rep1.CNhs11781.10071-101I8	20.57	4.84	7.26	0	0	32.67
duodenum, fetal, donor1, tech_rep2.CNhs12997.10071-101I8	17.99	1.59	4.23	1.06	0.53	25.4
dura mater, adult, donor1.CNhs10648.10041-101F5	17.12	15.29	1.71	1.77	2.53	38.42
embryonic kidney cell line: HEK293/SLAM infection, 24hr.CNhs11047.10451-106G1	0.6	11.73	0	2.86	0	15.19
embryonic kidney cell line: HEK293/SLAM untreated.CNhs11046.10450-106F9	1.76	9.44	0	1.35	0.31	12.86
embryonic pancreas cell line:1B2C6.CNhs11731.10604-108F1	7.98	28.58	1.99	0	0	38.55
embryonic pancreas cell line:1C3D3.CNhs11732.10605-108F2	12.58	24.49	1.99	0.33	0.33	39.72
embryonic pancreas cell line:1C3IKEI.CNhs11733.10606-108F3	9.73	17.89	1.26	1.57	0	30.45
embryonic pancreas cell line:2C6.CNhs11814.10603-108E9	15.53	20.31	2.39	0	0	38.23
endometrial carcinoma cell line:OMC-2.CNhs11266.10497-107C2	0.28	2.28	0.57	0	0.28	3.41
endometrial stromal sarcoma cell line:OMC-9.CNhs11249.10448-106F7	3.88	4.71	0.69	1.94	0.14	11.36
endometrioid adenocarcinoma cell line:JHUEM-1.CNhs11748.10643-109A4	5.21	6.6	0.87	0.87	0.35	13.9
Endothelial Cells - Aortic, donor0.CNhs10837.11207-116A1	9.74	10.73	1.99	1.39	0.6	24.45
Endothelial Cells - Aortic, donor1.CNhs12495.11263-116G3	12.9	6.02	0.86	0	0	19.78
Endothelial Cells - Aortic, donor2.CNhs11375.11340-117F8	9.03	10.07	2.08	0.35	1.04	22.57
Endothelial Cells - Aortic, donor3.CNhs12022.11412-118E8	9.04	8.48	1.13	0	1.7	20.35
Endothelial Cells - Artery, donor1.CNhs12496.11264-116G4	14.26	7.55	2.94	0.84	0.42	26.01
Endothelial Cells - Artery, donor2.CNhs11977.11341-117F9	9.08	7.98	1.38	1.1	0.55	20.09
Endothelial Cells - Artery, donor3.CNhs12023.11413-118E9	8.15	8.78	2.09	0.21	0.42	19.65
Endothelial Cells - Lymphatic, donor1.CNhs10865.11236-116D3	6.98	6.2	2.33	0	0	15.51
Endothelial Cells - Lymphatic, donor2.CNhs11901.11317-117D3	5.34	6.76	1.42	0	0	13.52
Endothelial Cells - Lymphatic, donor3.CNhs11906.11393-118C7	6.02	6.36	1.34	0	0	13.72
Endothelial Cells - Microvascular, donor1.CNhs11925.11265-116G5	7.25	8.86	0.81	0.4	0	17.32
Endothelial Cells - Microvascular, donor2.CNhs11376.11342-117G1	8.36	11.4	3.04	0	0	22.8
Endothelial Cells - Microvascular, donor3.CNhs12024.11414-118F1	10.49	8.79	2.2	0.73	0.73	22.94
Endothelial Cells - Thoracic, donor1.CNhs11926.11266-116G6	8.46	3.68	1.1	0	0	13.24
Endothelial Cells - Thoracic, donor2.CNhs11978.11343-117G2	10.53	9.72	0	0	1.62	21.87
Endothelial Cells - Umbilical vein, donor1.CNhs10872.11243-116E1	7.05	4.55	1.34	0.45	0.45	13.84
Endothelial Cells - Umbilical vein, donor2.CNhs11967.11324-117E1	9.88	5.16	0.9	0.45	0.45	16.84
Endothelial Cells - Umbilical vein, donor3.CNhs12010.11400-118D5	6.98	8.67	1.24	0.56	0.56	18.01
Endothelial Cells - Vein, donor1.CNhs12497.11267-116G7	1.53	12.27	3.07	1.53	1.53	19.93
Endothelial Cells - Vein, donor2.CNhs11377.11344-117G3	12.34	5.7	0	0	0	18.04
Endothelial Cells - Vein, donor3.CNhs12026.11416-118F3	9.53	7.69	2.75	0.73	0.37	21.07
Eosinophils, donor2.CNhs12548.12245-129H4	13.18	27.67	10.54	0	0	51.39
Eosinophils, donor3.CNhs12549.12246-129H5	19.39	31.02	11.63	0	0	62.04
epidermoid carcinoma cell line:A431.CNhs10743.10426-106D3	7.55	15.19	0.98	0.59	0.29	24.6
epidermoid carcinoma cell line:Ca Ski.CNhs10748.10431-106D8	9.32	7.57	2	0.61	1.04	20.54
epididymis, adult.CNhs12847.10197-103E8	15.73	8.04	1.75	2.62	0.35	28.49
epithelioid sarcoma cell line:HS-ES-1.CNhs11247.10443-106F2	5.68	5.68	1.03	2.41	0.34	15.14
epitheloid carcinoma cell line: HelaS3 ENCODE, biol_rep1.CNhs12325.10815-111B5	7.06	7.55	1.26	0.58	0.68	17.13
epitheloid carcinoma cell line: HelaS3 ENCODE, biol_rep2.CNhs12326.10816-111B6	5.48	7.67	0.95	0.8	0.58	15.48
epitheloid carcinoma cell line: HelaS3 ENCODE, biol_rep3.CNhs12327.10817-111B7	4.84	9.36	1.64	0.66	0.41	16.91
Esophageal Epithelial Cells, donor1.CNhs11323.11507-119G4	19.62	23.11	3.05	2.62	0	48.4
esophagus, adult, pool1.CNhs10620.10015-101C6	27.84	26.67	6.69	1.75	1.07	64.02
Ewing's sarcoma cell line:Hs 863.T.CNhs11836.10705-109H3	7.45	8.95	2.48	2.48	0	21.36
extraskeletal myxoid chondrosarcoma cell line:H-EMC-SS.CNhs10728.10410-106B5	10.59	8.21	0.18	3.88	0.62	23.48
eye, fetal, donor1.CNhs11762.10054-101G9	10.62	2.94	2.26	0.68	1.36	17.86
Fibroblast - Aortic Adventitial, donor1.CNhs10874.11245-116E3	6.46	4.81	1.52	0.89	0.13	13.81
Fibroblast - Aortic Adventitial, donor2 (nuclear fraction).CNhs12581.14332-155F3	7.94	10.86	2.12	0.66	0	21.58
Fibroblast - Aortic Adventitial, donor3 (nuclear fraction).CNhs12400.14311-155C9	20.08	5.74	1.15	0.86	0	27.83
Fibroblast - Aortic Adventitial, donor3.CNhs12011.11401-118D6	14.19	9.22	2.48	1.06	0.71	27.66
Fibroblast - Cardiac, donor1.CNhs12498.11268-116G8	8.97	4.49	1.68	0	0.56	15.7
Fibroblast - Cardiac, donor2.CNhs11378.11345-117G4	11.74	2.13	0	2.13	1.07	17.07
Fibroblast - Cardiac, donor3.CNhs12027.11417-118F4	6.41	5.92	2.22	0.99	0.49	16.03
Fibroblast - Cardiac, donor4.CNhs11909.11452-119A3	7.47	7.78	1.56	0.93	0.31	18.05
Fibroblast - Cardiac, donor5.CNhs12057.11456-119A7	5.79	6.33	1.75	0.67	0.54	15.08
Fibroblast - Cardiac, donor6.CNhs12061.11460-119B2	7.19	5.07	0.65	0.98	0.16	14.05
Fibroblast - Choroid Plexus, donor1.CNhs11319.11492-119E7	7.57	7.57	1.06	1.21	0.76	18.17
Fibroblast - Choroid Plexus, donor2.CNhs12344.11572-120E6	9.22	4.03	1.15	2.3	0	16.7
Fibroblast - Conjunctival, donor1.CNhs11339.11531-120A1	6.56	6.8	0.7	0.47	0	14.53
Fibroblast - Dermal, donor1.CNhs12499.11269-116G9	8.43	14.05	3.12	0.62	0	26.22
Fibroblast - Dermal, donor2.CNhs11379.11346-117G5	10.27	11.41	1.14	0.57	1.71	25.1
Fibroblast - Dermal, donor3.CNhs12028.11418-118F5	13.15	14.05	4.04	1.79	0.6	33.63
Fibroblast - Dermal, donor4.CNhs12052.11450-119A1	3.88	7.52	0.47	0.7	0.7	13.27
Fibroblast - Dermal, donor5.CNhs12055.11454-119A5	4.53	4.69	0.97	1.13	0	11.32
Fibroblast - Dermal, donor6.CNhs12059.11458-119A9	5.48	8.43	1.4	1.4	0.42	17.13
Fibroblast - Gingival, donor1.CNhs10866.11237-116D4	5.51	8.98	1.84	0.41	0	16.74
Fibroblast - Gingival, donor2.CNhs11961.11318-117D4	7.37	5.16	1.47	0.86	0.12	14.98
Fibroblast - Gingival, donor3.CNhs12006.11394-118C8	11.57	11.78	3.72	0.72	0.41	28.2
Fibroblast - Gingival, donor4 (GFH2).CNhs10848.11222-116B7	15.44	4.75	8.32	4.75	0	33.26
Fibroblast - Gingival, donor5 (GFH3).CNhs11952.11303-117B7	13.85	6.18	2.97	0.99	0.25	24.24
Fibroblast - Lymphatic, donor1.CNhs11322.11506-119G3	18.2	23.66	2.73	0.91	0.91	46.41
Fibroblast - Lymphatic, donor3.CNhs12118.11667-122G2	22.28	14.37	2.16	2.16	0.72	41.69
Fibroblast - Periodontal Ligament, donor1.CNhs10867.11238-116D5	4.88	3.37	0.84	0.84	0.17	10.1
Fibroblast - Periodontal Ligament, donor2.CNhs11962.11319-117D5	6.88	5.88	0.75	1	0.13	14.64
Fibroblast - Periodontal Ligament, donor3.CNhs11907.11395-118C9	10.25	8.03	4.43	0.83	0	23.54
Fibroblast - Periodontal Ligament, donor4 (PL29).CNhs12493.11223-116B8	11.41	4.39	0.88	1.32	0	18
Fibroblast - Periodontal Ligament, donor5 (PL30).CNhs11953.11304-117B8	9.19	6.74	1.84	1.23	0	19
Fibroblast - Periodontal Ligament, donor6 (PLH3).CNhs11996.11380-118B3	15.32	11.27	4.06	1.35	0.75	32.75
Fibroblast - Pulmonary Artery, donor1.CNhs10878.11250-116E8	3.52	4.31	0.23	0.68	0.11	8.85
Fibroblast - skin dystrophia myotonica, donor1 (nuclear fraction).CNhs12405.14329-155E9	17.58	7	4.13	3.05	0.18	31.94
Fibroblast - skin dystrophia myotonica, donor1.CNhs11353.11556-120C8	7.9	3.84	1.92	0.43	1.07	15.16
Fibroblast - skin dystrophia myotonica, donor2.CNhs11354.11557-120C9	9.11	5.93	1.91	1.48	0.21	18.64
Fibroblast - skin dystrophia myotonica, donor3 (nuclear fraction).CNhs12399.14308-155C6	10.8	4.2	2.1	1.8	0.9	19.8
Fibroblast - skin dystrophia myotonica, donor3.CNhs11913.11560-120D3	8.24	5.26	3.09	0.82	0.31	17.72
Fibroblast - skin normal, donor1 (nuclear fraction).CNhs12403.14323-155E3	17	5.93	5.93	2.32	0.52	31.7
Fibroblast - skin normal, donor1.CNhs11351.11553-120C5	14.14	5.58	2.79	0.93	0.56	24
Fibroblast - skin normal, donor2 (nuclear fraction).CNhs12582.14302-155B9	12.66	6.58	3.04	1.52	0.17	23.97
Fibroblast - skin normal, donor2.CNhs11914.11561-120D4	7.31	4.68	2.44	1.46	0.39	16.28
Fibroblast - skin spinal muscular atrophy, donor1 (nuclear fraction).CNhs12404.14326-155E6	18.93	4.8	3.03	2.02	0.25	29.03
Fibroblast - skin spinal muscular atrophy, donor1.CNhs11074.11555-120C7	9.39	4.97	3.13	1.01	0.55	19.05
Fibroblast - skin spinal muscular atrophy, donor2.CNhs11911.11558-120D1	14.87	5.82	3.07	0.48	0	24.24
Fibroblast - skin spinal muscular atrophy, donor3 (nuclear fraction).CNhs12398.14305-155C3	14.91	3.2	3.91	1.78	0	23.8
Fibroblast - skin spinal muscular atrophy, donor3.CNhs11912.11559-120D2	8.16	5.04	1.91	1.41	0.2	16.72
Fibroblast - skin walker warburg, donor1.CNhs11352.11554-120C6	9.66	5.09	2.54	1.36	0.68	19.33
fibrosarcoma cell line:HT-1080.CNhs11860.10758-110E2	6.17	9.18	1.1	0.27	0.14	16.86
fibrous histiocytoma cell line:GCT TIB-223.CNhs11842.10711-109H9	4.17	8.35	1.59	0.79	0	14.9
frontal lobe, adult, pool1.CNhs10647.10040-101F4	12.35	8.8	1.27	14.18	7.6	44.2
gall bladder carcinoma cell line:TGBC14TKB.CNhs11256.10470-106I2	8.02	5.48	1.76	0	0.39	15.65
gall bladder carcinoma cell line:TGBC2TKB.CNhs10733.10415-106C1	7.29	8.74	2.89	0.16	0.48	19.56
gall bladder, adult.CNhs12848.10198-103E9	33.09	16.01	5.34	3.63	1.07	59.14
gastric adenocarcinoma cell line:MKN1.CNhs11737.10614-108G2	10.59	3.4	3.2	0.2	1.8	19.19
gastric adenocarcinoma cell line:MKN45.CNhs11819.10612-108F9	9.22	15.42	2.59	0.86	0.14	28.23
gastric cancer cell line:AZ521.CNhs11286.10549-107H9	1.95	5.5	0.34	0	0.57	8.36
gastrointestinal carcinoma cell line:ECC12.CNhs11738.10615-108G3	1.72	3.26	2.06	0.69	0.86	8.59
giant cell carcinoma cell line:LU65.CNhs11274.10487-107B1	3.6	17.72	0.86	1.73	0.58	24.49
giant cell carcinoma cell line:Lu99B.CNhs10751.10433-106E1	12.43	10.31	2.36	0.37	0.25	25.72
Gingival epithelial cells, donor1 (GEA11).CNhs11061.11221-116B6	10.24	14.11	2.13	0.97	0.77	28.22
Gingival epithelial cells, donor2 (GEA14).CNhs11896.11302-117B6	9.82	12.27	1.64	1.09	0.82	25.64
Gingival epithelial cells, donor3 (GEA15).CNhs11903.11379-118B2	8.89	18.64	3.73	0.86	1.15	33.27
glassy cell carcinoma cell line:HOKUG.CNhs11824.10688-109F4	4.01	8.01	5.66	0.47	0.24	18.39
glioblastoma cell line:A172, tech_rep2.CNhs11248.10444-106F3	4.48	7.34	2.17	0.54	0.27	14.8
glioblastoma cell line:A172.CNhs11185.10444-106F3	5.75	7.53	1.57	1.78	1.15	17.78
glioblastoma cell line:T98G.CNhs11272.10485-107A8	6.83	2.86	1.12	0.31	0.61	11.73
glioma cell line:GI-1.CNhs10731.10413-106B8	6.07	8.09	1.73	0.58	0	16.47
globus pallidus - adult, donor10196.CNhs13801.10175-103C4	10.21	3.6	2.4	3	0.6	19.81
globus pallidus, adult, donor10252.CNhs12319.10161-103A8	13.42	7.67	6.02	4.38	1.92	33.41
granulocyte macrophage progenitor, donor1.CNhs12519.12131-128D7	42.16	20.44	6.39	2.55	3.83	75.37
granulosa cell tumor cell line:KGN.CNhs11740.10624-108H3	12.03	6.02	4.73	1.72	0.43	24.93
H9 Embryoid body cells, melanocytic induction, day00, biol_rep1 (H9EB-1 d0).CNhs12822.12627-134E8	1.28	5.23	0	1.05	0.7	8.26
H9 Embryoid body cells, melanocytic induction, day00, biol_rep2 (H9EB-2 d0).CNhs12825.12725-135G7	0.73	6.63	0.41	1.87	0.93	10.57
H9 Embryoid body cells, melanocytic induction, day00, biol_rep3 (H9EB-3 d0).CNhs12908.12823-136I6	2.27	6.31	0.25	1.77	1.01	11.61
H9 Embryonic Stem cells, biol_rep2 (H9ES-2).CNhs12824.12724-135G6	1.1	10.12	0.24	1.34	0.73	13.53
H9 Embryonic Stem cells, biol_rep3 (H9ES-3).CNhs12837.12822-136I5	1.72	6.1	0.13	2.12	1.33	11.4
Hair Follicle Dermal Papilla Cells, donor1.CNhs12501.11271-116H2	9.39	6.26	3.13	0	0	18.78
Hair Follicle Dermal Papilla Cells, donor2.CNhs11979.11348-117G7	9.65	10.29	1.29	1.93	0.64	23.8
Hair Follicle Dermal Papilla Cells, donor3.CNhs12030.11420-118F7	5.53	6.91	2.76	0	1.38	16.58
Hair Follicle Outer Root Sheath Cells, donor1.CNhs12339.11504-119G1	10.68	8.82	1.39	0.93	0	21.82
Hair Follicle Outer Root Sheath Cells, donor2.CNhs12347.11584-120F9	7.94	4.33	2.17	0.72	0	15.16
hairy cell leukemia cell line:Mo.CNhs11843.10712-109I1	5.78	17.09	2.1	0	0.26	25.23
heart - mitral valve, adult.CNhs12855.10205-103F7	10.89	5.31	1.12	1.12	1.12	19.56
heart - pulmonic valve, adult.CNhs12856.10206-103F8	14.9	7.1	3.9	1.83	0.46	28.19
heart - tricuspid valve, adult.CNhs12857.10207-103F9	5.03	11.49	1.44	3.59	0	21.55
heart, adult, diseased post-infarction, donor1.CNhs11757.10050-101G5	7.19	7.39	2.6	1.6	0.8	19.58
heart, adult, diseased, donor1.CNhs11758.10051-101G6	6.44	6.44	2.58	0.86	0.43	16.75
heart, adult, pool1.CNhs10621.10016-101C7	9.37	9.6	3.79	1.34	1.12	25.22
heart, fetal, pool1.CNhs10653.10046-101G1	10.28	5.64	3.96	0.74	1.48	22.1
Hep-2 cells mock treated, biol_rep1.CNhs13479.11898-125E8	1.89	3.55	0.95	0.24	0.35	6.98
Hep-2 cells mock treated, biol_rep2.CNhs13500.11899-125E9	3.37	3.71	1.52	0.67	0.34	9.61
Hep-2 cells mock treated, biol_rep3.CNhs13501.11900-125F1	2.17	4.34	0.72	0	0.24	7.47
Hep-2 cells treated with Streptococci strain 5448, biol_rep1.CNhs13477.11890-125D9	1.87	4.08	1.1	0	0.22	7.27
Hep-2 cells treated with Streptococci strain 5448, biol_rep2.CNhs13496.11891-125E1	2.4	4.58	1.09	0	0.22	8.29
Hep-2 cells treated with Streptococci strain 5448, biol_rep3.CNhs13497.11892-125E2	4.27	4.75	0.24	0.24	0	9.5
Hep-2 cells treated with Streptococci strain JRS4, biol_rep1.CNhs13478.11894-125E4	1.89	2.97	0.67	0.4	0	5.93
Hep-2 cells treated with Streptococci strain JRS4, biol_rep2.CNhs13498.11895-125E5	2.16	3.53	0.59	0.2	0.2	6.68
Hep-2 cells treated with Streptococci strain JRS4, biol_rep3.CNhs13499.11896-125E6	0.77	2.31	0.77	0	0	3.85
hepatic mesenchymal tumor cell line:LI90.CNhs11868.10778-110G4	7.21	15.13	1.8	2.16	0	26.3
Hepatic Sinusoidal Endothelial Cells, donor1.CNhs12075.11521-119H9	17.72	8.86	2.21	0	0	28.79
Hepatic Sinusoidal Endothelial Cells, donor2.CNhs12092.11601-120H8	19.63	4.21	1.4	2.8	0	28.04
Hepatic Stellate Cells (lipocyte), donor1.CNhs11335.11524-119I3	9.47	8.64	1.65	0.82	0.82	21.4
Hepatic Stellate Cells (lipocyte), donor2.CNhs12093.11604-120I2	14.7	7.35	2.94	1.47	0	26.46
hepatoblastoma cell line:HuH-6.CNhs11742.10633-108I3	0	5.82	0	0	0	5.82
hepatocellular carcinoma cell line: HepG2 ENCODE, biol_rep1.CNhs12328.10818-111B8	2.52	8.59	1.18	0.55	0.47	13.31
hepatocellular carcinoma cell line: HepG2 ENCODE, biol_rep2.CNhs12329.10819-111B9	1.48	7.01	1.65	0	0.58	10.72
hepatocellular carcinoma cell line: HepG2 ENCODE, biol_rep3.CNhs12330.10820-111C1	1.48	7.95	1.55	0.54	0.34	11.86
Hepatocyte, donor1.CNhs12340.11523-119I2	2.54	5.07	8.87	0	0	16.48
Hepatocyte, donor2.CNhs12349.11603-120I1	5.9	12.78	8.85	1.97	0.98	30.48
Hepatocyte, donor3.CNhs12626.11684-122I1	4.73	10.04	1.18	1.77	0.59	18.31
hepatoma cell line:Li-7.CNhs11271.10484-107A7	5.91	3.35	3.44	0.1	0.79	13.59
hereditary spherocytic anemia cell line:WIL2-NS.CNhs11891.10808-111A7	2.46	9.06	0.34	0.85	0.42	13.13
HES3-GFP Embryonic Stem cells, cardiomyocytic induction, day00, biol_rep3 (UH-3).CNhs13738.13366-143F9	0.73	4.74	0	1.46	0.36	7.29
hippocampus - adult, donor10196.CNhs13795.10169-103B7	6.36	3.98	1.59	7.16	0.8	19.89
hippocampus, adult, donor10252.CNhs12312.10153-102I9	9.13	7.08	3.27	12.39	1.77	33.64
Hodgkin's lymphoma cell line:HD-Mar2.CNhs11715.10435-106E3	7.5	2.21	0.88	1.32	0.44	12.35
immature langerhans cells, donor1.CNhs13537.11904-125F5	4.05	5.85	0.45	0.9	0.67	11.92
immature langerhans cells, donor2.CNhs13480.11905-125F6	8.51	6.96	1.55	1.55	0.77	19.34
insula, adult, pool1.CNhs10646.10039-101F3	11.6	9.6	1.21	13.43	6.93	42.77
Intestinal epithelial cells (polarized), donor1.CNhs10875.11246-116E4	3.07	5.9	1.48	0.12	0	10.57
iPS differentiation to neuron, control donor C11-CRL2429, day00, rep2.CNhs13822.13425-144D5	0.16	4.5	0	1.77	0	6.43
iPS differentiation to neuron, control donor C32-CRL1502, day00, rep1.CNhs13826.13433-144E4	0.55	6.74	0	0.28	0.14	7.71
iPS differentiation to neuron, control donor C32-CRL1502, day00, rep2.CNhs13839.13437-144E8	0.42	4.99	0	1.66	0	7.07
Iris Pigment Epithelial Cells, donor1.CNhs12596.11530-119I9	2.57	5.49	0.34	0.17	0	8.57
Keratinocyte - epidermal, donor1.CNhs11064.11272-116H3	21.51	27.33	4.17	1.1	0.77	54.88
Keratinocyte - epidermal, donor2.CNhs11381.11349-117G8	4.5	19.11	1.12	1.12	0	25.85
Keratinocyte - epidermal, donor3.CNhs12031.11421-118F8	7.74	15.68	1.41	0.8	0.1	25.73
Keratinocyte - oral, donor1.CNhs10879.11251-116E9	10.46	16.3	0.56	0.93	0.37	28.62
keratoacanthoma cell line:HKA-1.CNhs11880.10791-110H8	8.72	5.03	2.68	0	0	16.43
Keratocytes, donor1.CNhs11337.11527-119I6	11.4	9.45	0.98	1.63	0	23.46
Keratocytes, donor2.CNhs12095.11607-120I5	9.36	8.32	6.24	4.16	0	28.08
kidney, adult, pool1.CNhs10622.10017-101C8	10.01	7.41	1.65	1.1	0.39	20.56
kidney, fetal, pool1.CNhs10652.10045-101F9	8.39	6.82	1.94	0.94	0.68	18.77
large cell lung carcinoma cell line:IA-LM.CNhs11277.10509-107D5	5.91	4.65	1.16	0.21	0.32	12.25
large cell lung carcinoma cell line:NCI-H460.CNhs12806.10839-111E2	9.68	8.25	1.08	0	0.54	19.55
large cell non-keratinizing squamous carcinoma cell line:SKG-II-SF.CNhs11825.10692-109F8	9.98	13.63	2.88	0.19	0.19	26.87
left atrium, adult, donor1.CNhs11790.10079-102A7	6.43	7.15	4.29	0	0.71	18.58
left ventricle, adult, donor1.CNhs11789.10078-102A6	9.27	6.62	1.32	0.66	0	17.87
leiomyoblastoma cell line:G-402.CNhs11848.10721-110A1	5.85	10.17	4.32	0	0.76	21.1
leiomyoma cell line:10964C.CNhs11722.10569-108B2	8.14	11.95	3.8	0	0.54	24.43
leiomyoma cell line:15242A.CNhs11723.10570-108B3	12.1	7.78	1.73	0	0	21.61
leiomyoma cell line:15425.CNhs11724.10571-108B4	8.49	7.51	1.96	1.63	0.98	20.57
lens epithelial cell line:SRA 01/04.CNhs11750.10647-109A8	5.99	3.59	2.39	3.59	2.39	17.95
Lens Epithelial Cells, donor1.CNhs12342.11529-119I8	7.22	4.33	0	0	0	11.55
Lens Epithelial Cells, donor2.CNhs12568.11609-120I7	4.41	2.55	0.58	0.93	0.58	9.05
Lens Epithelial Cells, donor3.CNhs12572.11690-122I7	2.94	3.87	1.06	0.23	0.12	8.22
leukemia, chronic megakaryoblastic cell line:MEG-01.CNhs11859.10752-110D5	6.81	6.4	1.48	0.16	0.57	15.42
liposarcoma cell line:KMLS-1.CNhs11870.10782-110G8	57.93	42.26	14.31	5.62	3.07	123.19
liposarcoma cell line:SW 872.CNhs11851.10726-110A6	8.16	4.99	2.72	0.45	1.02	17.34
liver, adult, pool1.CNhs10624.10018-101C9	4.69	14.36	6.01	1.03	0.73	26.82
liver, fetal, pool1.CNhs11798.10086-102B5	11.93	7.95	14.58	0	0	34.46
locus coeruleus - adult, donor10196.CNhs13808.10182-103D2	7.11	7.37	1.16	3.75	1.16	20.55
locus coeruleus, adult, donor10252.CNhs12322.10165-103B3	8.6	7.01	3.83	6.21	1.19	26.84
lung adenocarcinoma cell line:A549.CNhs11275.10499-107C4	4.11	5.82	0.68	0.68	0.17	11.46
lung adenocarcinoma cell line:PC-14.CNhs10726.10408-106B3	9.16	4.93	3.52	0	0.7	18.31
lung, adult, pool1.CNhs10625.10019-101D1	17.51	11.32	3.84	1.28	0.64	34.59
lung, fetal, donor1.CNhs11680.10068-101I5	10.53	3.93	3.3	0.63	1.26	19.65
lung, right lower lobe, adult, donor1.CNhs11786.10075-102A3	13.26	9.11	8.7	0.41	0.41	31.89
lymph node, adult, donor1.CNhs11788.10077-102A5	17.37	17.86	3.47	2.48	0	41.18
lymphangiectasia cell line:DS-1.CNhs11852.10727-110A7	4.35	9.29	1.38	0.79	0.4	16.21
Lymphatic Endothelial cells response to VEGFC, 00hr00min, biol_rep1 (MM XIX - 1).CNhs11936.12260-130A1	5.92	6.06	0.72	1.15	0	13.85
Lymphatic Endothelial cells response to VEGFC, 00hr00min, biol_rep2 (MM XIV - 1).CNhs13157.12382-131E6	6.94	4.63	0.46	0	0.46	12.49
Lymphatic Endothelial cells response to VEGFC, 00hr00min, biol_rep3 (MM XXII - 1 ).CNhs13276.12504-133A2	5.9	4.95	1.33	0	0.76	12.94
lymphoma, malignant, hairy B-cell cell line:MLMA.CNhs11935.10775-110G1	4.14	9.99	0.24	0.61	0.24	15.22
Macrophage - monocyte derived, donor1.CNhs10861.11232-116C8	16	5.42	6.4	0.49	0	28.31
Macrophage - monocyte derived, donor2.CNhs11899.11313-117C8	7.25	7.96	4.91	0.47	0.7	21.29
Macrophage - monocyte derived, donor3.CNhs12003.11389-118C3	15.9	8.92	8.17	0.59	0.15	33.73
malignant trichilemmal cyst cell line:DJM-1.CNhs10730.10412-106B7	12.13	4.47	0.64	0.64	0	17.88
Mallassez-derived cells, donor1 (MZH3).CNhs12538.12142-128E9	6.56	5.62	3.75	0	0	15.93
Mallassez-derived cells, donor2.CNhs13550.11929-125I3	9.91	6.22	1.85	0.17	0	18.15
Mallassez-derived cells, donor3.CNhs13551.11930-125I4	8.22	8.51	2.27	0.28	0.85	20.13
Mammary Epithelial Cell, donor1.CNhs11077.11273-116H4	2.69	13.08	0.45	0.36	0.27	16.85
Mammary Epithelial Cell, donor2.CNhs11382.11350-117G9	6.39	13.95	0.58	0.29	0	21.21
Mammary Epithelial Cell, donor3.CNhs12032.11422-118F9	10.73	19.55	3.45	1.15	0	34.88
Mast cell - stimulated, donor1.CNhs11073.11487-119E2	9.85	0.49	8.87	0	0.49	19.7
Mast cell, donor1.CNhs12566.11563-120D6	30.55	2.55	41.82	1.58	0.62	77.12
Mast cell, donor2.CNhs12594.11565-120D8	58.88	8.92	15.55	0.62	2.7	86.67
Mast cell, donor3.CNhs12593.11566-120D9	59.67	5.76	11.1	1.01	2.88	80.42
Mast cell, donor4.CNhs12592.11567-120E1	75.62	9.09	19.57	1.14	3.16	108.58
mature adipocyte, donor1.CNhs12558.12231-129F8	9.79	14.69	0	2.18	0	26.66
mature adipocyte, donor2.CNhs12559.12232-129F9	9.02	15.79	0.5	2.26	2.01	29.58
mature adipocyte, donor3.CNhs12560.12233-129G1	8.58	14.7	1.23	2.14	1.53	28.18
mature adipocyte, donor4.CNhs12562.12234-129G2	10.49	9.51	1.31	0.33	0.66	22.3
maxillary sinus tumor cell line:HSQ-89.CNhs10732.10414-106B9	3.77	5.18	1.1	0.47	1.1	11.62
MCF7 breast cancer cell line response to EGF1, 00hr00min, biol_rep2.CNhs12475.13097-140D1	9.48	16.59	8.69	1.58	2.37	38.71
MCF7 breast cancer cell line response to EGF1, 00hr00min, biol_rep3.CNhs12703.13163-141B4	16.31	12.02	10.3	0	1.72	40.35
medial frontal gyrus - adult, donor10196.CNhs13796.10170-103B8	7.09	11.52	0	8.86	7.09	34.56
medial temporal gyrus - adult, donor10196.CNhs13809.10183-103D3	8.54	8.54	1.95	9.15	3.17	31.35
medial temporal gyrus, adult, donor10252.CNhs12310.10150-102I6	10.52	5.63	2.38	15.52	4.63	38.68
medulla oblongata - adult, donor10196.CNhs13800.10174-103C3	5.16	5.16	2.29	0.57	1.15	14.33
medulla oblongata, adult, donor10252.CNhs12315.10155-103A2	10.54	8.65	4.33	4.1	1	28.62
medulla oblongata, adult, pool1.CNhs10645.10038-101F2	11.98	9.69	2.61	4.66	2.24	31.18
medulloblastoma cell line:D283 Med.CNhs12805.10838-111E1	2.49	3.74	1.38	0.69	0.28	8.58
medulloblastoma cell line:ONS-76.CNhs11861.10759-110E3	4.12	7.5	1.87	0.37	0.37	14.23
Melanocyte - dark, donor3.CNhs12570.11663-122F7	11.37	5.97	0.89	1.52	0.57	20.32
Melanocyte - light, donor1.CNhs11303.11274-116H5	23.68	13.75	3.82	1.53	0.76	43.54
Melanocyte - light, donor2.CNhs11383.11351-117H1	23.44	7.03	1.17	2.34	0	33.98
Melanocyte - light, donor3.CNhs12033.11423-118G1	11.98	15.4	6.84	0	1.71	35.93
Melanocyte, donor1 (MC+1).CNhs12816.12641-134G4	8.33	6.58	1.85	1.44	0.51	18.71
Melanocyte, donor2 (MC+2).CNhs13156.12739-135I3	6.01	4.81	1.8	0.6	0.6	13.82
Melanocyte, donor3 (MC+3).CNhs13406.12837-137B2	8.57	4.29	1.14	1.14	0.57	15.71
melanoma cell line:COLO 679.CNhs11281.10514-107E1	5.61	7.58	0.76	0.61	0.45	15.01
melanoma cell line:G-361.CNhs11254.10465-106H6	8.85	6.57	0.57	0.86	0.29	17.14
Meningeal Cells, donor1.CNhs11320.11493-119E8	8.63	7.51	0.9	0.34	0.67	18.05
Meningeal Cells, donor2.CNhs12080.11573-120E7	6.1	4.8	0.87	0.44	1.31	13.52
Meningeal Cells, donor3.CNhs12731.11654-122E7	5.72	5.06	0.44	0.51	0.37	12.1
meningioma cell line:HKBMM.CNhs11945.10691-109F7	11.53	15.53	4.23	0	0.24	31.53
merkel cell carcinoma cell line:MKL-1.CNhs12838.10843-111E6	4.68	1.41	0.47	1.41	0.47	8.44
merkel cell carcinoma cell line:MS-1.CNhs12839.10844-111E7	5.8	3.04	0.58	1.16	0.29	10.87
mesenchymal precursor cell - adipose, donor1.CNhs12363.11747-123G1	8.66	6.42	2.39	1.19	0	18.66
mesenchymal precursor cell - adipose, donor2.CNhs12364.11748-123G2	7.95	8.18	1.64	1.64	0.47	19.88
mesenchymal precursor cell - adipose, donor3.CNhs12365.11749-123G3	21.08	6.66	1.11	1.11	0.55	30.51
mesenchymal precursor cell - bone marrow, donor1.CNhs12366.11750-123G4	8.71	8.9	4.17	0.57	0.57	22.92
mesenchymal precursor cell - bone marrow, donor2.CNhs12367.11751-123G5	6.54	7.8	2.01	0.5	0	16.85
mesenchymal precursor cell - bone marrow, donor3.CNhs13098.11840-124H4	16.91	8.01	5.34	4.45	0	34.71
mesenchymal precursor cell - cardiac, donor1.CNhs12368.11752-123G6	8.92	12.36	3.66	1.14	0.46	26.54
mesenchymal precursor cell - cardiac, donor2.CNhs12369.11753-123G7	12.25	12.7	3.63	2.12	0.3	31
mesenchymal precursor cell - cardiac, donor3.CNhs12370.11754-123G8	7.31	6.84	1.4	0.93	0.62	17.1
mesenchymal precursor cell - cardiac, donor4.CNhs12371.11755-123G9	7.54	6.36	2.07	0.89	0	16.86
mesenchymal precursor cell - ovarian cancer left ovary, donor1.CNhs12372.11756-123H1	5.73	7.96	2.23	0.48	0.16	16.56
mesenchymal precursor cell - ovarian cancer left ovary, donor2.CNhs13092.11833-124G6	13.04	5.4	1.8	0.9	0.45	21.59
mesenchymal precursor cell - ovarian cancer left ovary, donor3.CNhs12376.11760-123H5	6.37	7.14	1.4	0.78	0	15.69
mesenchymal precursor cell - ovarian cancer left ovary, donor4.CNhs13094.11836-124G9	9.95	4.15	1.24	0.41	0.41	16.16
mesenchymal precursor cell - ovarian cancer metastasis, donor1.CNhs12374.11758-123H3	7.71	5.05	2.39	1.6	0.27	17.02
mesenchymal precursor cell - ovarian cancer metastasis, donor2.CNhs13093.11835-124G8	10.43	7.3	1.57	0	0.52	19.82
mesenchymal precursor cell - ovarian cancer metastasis, donor3.CNhs12378.11762-123H7	7.51	7.06	2.55	0.75	0	17.87
mesenchymal precursor cell - ovarian cancer metastasis, donor4.CNhs13097.11838-124H2	5.33	5.71	4.19	0.38	0.76	16.37
mesenchymal precursor cell - ovarian cancer right ovary, donor1.CNhs12373.11757-123H2	6.51	1.63	0.81	0.41	0.41	9.77
mesenchymal precursor cell - ovarian cancer right ovary, donor2.CNhs12375.11759-123H4	5.64	8.91	1.64	2.18	0.73	19.1
mesenchymal precursor cell - ovarian cancer right ovary, donor3 (SOC-57-02).CNhs12377.11761-123H6	6.55	6.12	1.83	0.86	0.11	15.47
mesenchymal precursor cell - ovarian cancer right ovary, donor3 (SOC-57-02-G).CNhs13507.11842-124H6	11.6	5.57	0.46	1.39	0.93	19.95
mesenchymal precursor cell - ovarian cancer right ovary, donor4.CNhs13096.11837-124H1	8.36	10.75	3.18	1.19	0.8	24.28
mesenchymal stem cell line:Hu5/E18.CNhs11718.10568-108B1	5.6	3.2	0.8	0.4	0.4	10.4
Mesenchymal stem cells - adipose, donor0.CNhs10844.11217-116B2	4.56	8.14	0.65	0.33	0	13.68
Mesenchymal Stem Cells - adipose, donor1.CNhs11345.11537-120A7	28.61	17.88	3.58	7.15	0	57.22
Mesenchymal Stem Cells - adipose, donor3.CNhs12922.11698-123A6	3.38	7.61	0	0	0	10.99
Mesenchymal Stem Cells - amniotic membrane, donor1.CNhs11349.11547-120B8	10.64	8.24	2.39	1.86	0.27	23.4
Mesenchymal Stem Cells - amniotic membrane, donor2.CNhs12104.11627-122B7	6.24	4.16	2.08	1.04	2.08	15.6
Mesenchymal Stem Cells - bone marrow, donor1.CNhs11344.11536-120A6	8.49	4.89	1.54	0.51	0.26	15.69
Mesenchymal Stem Cells - bone marrow, donor2.CNhs12100.11616-122A5	14.18	4.26	2.84	0	0	21.28
Mesenchymal Stem Cells - bone marrow, donor3.CNhs12126.11697-123A5	11.72	8.79	1.33	1.33	0.27	23.44
Mesenchymal stem cells - hepatic, donor0.CNhs10845.11218-116B3	8.53	5.33	0	1.07	1.42	16.35
Mesenchymal Stem Cells - hepatic, donor2.CNhs12730.11618-122A7	8.72	4	1.57	1	0.86	16.15
Mesenchymal stem cells - umbilical, donor0.CNhs12492.11214-116A8	1.58	6.34	0	0	0	7.92
Mesenchymal Stem Cells - umbilical, donor1.CNhs11347.11539-120A9	15.74	8.68	5.43	0.54	0.54	30.93
Mesenchymal Stem Cells - umbilical, donor3.CNhs12127.11700-123A8	7.41	3.29	2.47	0.82	0	13.99
Mesenchymal Stem Cells - Wharton's Jelly, donor1.CNhs11057.11548-120B9	6.72	10.6	2.33	0.9	0	20.55
mesenchymal stem cells (adipose derived), adipogenic induction, 00hr00min, biol_rep2.CNhs13420.13230-141I8	10.65	7.9	1.72	1.37	0	21.64
mesenchymal stem cells (adipose derived), adipogenic induction, 00hr00min, biol_rep3.CNhs13421.13231-141I9	15.49	5.05	0.67	2.02	0.67	23.9
mesodermal tumor cell line:HIRS-BM.CNhs12191.10696-109G3	6.31	7.57	5.05	3.79	0	22.72
Mesothelial Cells, donor1.CNhs10850.11247-116E5	6.33	5.73	2.71	2.11	0.3	17.18
Mesothelial Cells, donor2.CNhs12197.12156-128G5	1.74	6.1	3.49	0.87	0.87	13.07
Mesothelial Cells, donor3.CNhs12012.11402-118D7	10.6	12.7	2	1.9	0.2	27.4
mesothelioma cell line:ACC-MESO-1.CNhs11263.10493-107B7	5.97	9.25	2.7	1.54	0.39	19.85
mesothelioma cell line:ACC-MESO-4.CNhs11264.10494-107B8	3.43	6	0.64	0.21	0.21	10.49
mesothelioma cell line:Mero-25.CNhs13066.10850-111F4	4.18	4.7	0.52	0.78	0.26	10.44
mesothelioma cell line:Mero-41.CNhs13067.10851-111F5	6.12	7.71	0.91	0.91	0.45	16.1
mesothelioma cell line:Mero-48a.CNhs13068.10852-111F6	10.42	5.56	1.39	0.69	0.23	18.29
mesothelioma cell line:Mero-82.CNhs13069.10853-111F7	11.01	9.3	0.98	0	0	21.29
mesothelioma cell line:Mero-83.CNhs13070.10854-111F8	10.92	8.78	2.33	0.9	0.18	23.11
mesothelioma cell line:Mero-84.CNhs13072.10855-111F9	8.34	11.43	0.62	0.31	0.31	21.01
mesothelioma cell line:Mero-95.CNhs13073.10856-111G1	6.8	3.95	1.75	0.44	0	12.94
mesothelioma cell line:NCI-H2052.CNhs13063.10847-111F1	6.89	6.01	2.47	0.71	0.35	16.43
mesothelioma cell line:NCI-H226.CNhs13062.10846-111E9	9.07	10.42	1.93	0	0	21.42
mesothelioma cell line:NCI-H2452.CNhs13064.10848-111F2	6.76	8.11	0.68	1.18	0.17	16.9
mesothelioma cell line:NCI-H28.CNhs13061.10845-111E8	3.59	6.92	0.77	1.28	0.26	12.82
mesothelioma cell line:No36.CNhs13074.10857-111G2	2.07	7.25	0.35	1.73	0.35	11.75
mesothelioma cell line:ONE58.CNhs13075.10858-111G3	8.51	11.24	1.52	0.61	0.3	22.18
middle temporal gyrus, donor10252.CNhs12316.10156-103A3	11.75	5.12	3.32	13.13	4.84	38.16
migratory langerhans cells, donor1.CNhs13535.11901-125F2	7.4	3.12	0.39	0	0	10.91
migratory langerhans cells, donor2.CNhs13536.11902-125F3	16.34	3.45	0.66	0.4	0	20.85
migratory langerhans cells, donor3.CNhs13547.11903-125F4	17.34	2.62	0.82	0.16	0.16	21.1
mixed mullerian tumor cell line:HTMMT.CNhs11944.10689-109F5	6.55	0.98	0.66	1.31	0.33	9.83
Monocyte-derived macrophages response to udorn influenza infection, 00hr00min, donor2 (150_120:Ud_0h).CNhs13646.13317-143A5	10.95	7.3	2.43	1.22	0	21.9
Monocyte-derived macrophages response to udorn influenza infection, 00hr00min, donor3 (536_119:Ud_0h).CNhs13650.13323-143B2	15.07	4.52	2.01	0.5	1.51	23.61
Monocyte-derived macrophages response to udorn influenza infection, 00hr00min, donor4 (227_121:Ud_0h).CNhs13639.13311-142I8	12.65	6.33	4.22	0	0	23.2
mucinous adenocarcinoma cell line:JHOM-1.CNhs11752.10648-109A9	6.64	5.16	1.23	0.49	0.25	13.77
mucinous cystadenocarcinoma cell line:MCAS.CNhs11873.10784-110H1	2.11	30.64	1.48	1.27	0.42	35.92
Multipotent Cord Blood Unrestricted Somatic Stem Cells, donor1.CNhs11350.11549-120C1	8.63	5.03	1.2	1.44	0.48	16.78
Multipotent Cord Blood Unrestricted Somatic Stem Cells, donor2.CNhs12105.11629-122B9	9.19	5.74	1.15	2.3	0	18.38
mycosis fungoides, T cell lymphoma cell line:HuT 102 TIB-162.CNhs11858.10744-110C6	7	4.4	2.2	0.4	0.2	14.2
myelodysplastic syndrome cell line:SKM-1.CNhs11934.10772-110F7	4.05	6.4	1.6	0.96	0.21	13.22
myeloma cell line:PCM6.CNhs11258.10474-106I6	9.99	16.53	2.58	0	0	29.1
Myoblast differentiation to myotubes, day00, control donor1.CNhs13847.13469-144I4	4.28	8.56	0	0	0	12.84
Myoblast, donor1.CNhs10870.11241-116D8	5.21	9.7	1.74	1.01	0.29	17.95
Myoblast, donor2.CNhs11965.11322-117D8	8.63	8.84	2.05	1.85	0.62	21.99
Myoblast, donor3.CNhs11908.11398-118D3	6.8	6.98	0.9	1.97	0.72	17.37
myxofibrosarcoma cell line:MFH-ino.CNhs11729.10600-108E6	4.54	9.65	2.27	0	0	16.46
myxofibrosarcoma cell line:NMFH-1.CNhs11821.10684-109E9	17.31	8.28	4.97	2.58	0.74	33.88
nasal epithelial cells, donor1, tech_rep1.CNhs12589.12226-129F3	4.48	14.55	1.68	0.7	0.28	21.69
nasal epithelial cells, donor2.CNhs12574.12227-129F4	18.04	17.42	0.62	0.62	0	36.7
Natural Killer Cells, donor1.CNhs10859.11230-116C6	31.13	18.13	1.38	0.39	5.91	56.94
Natural Killer Cells, donor2.CNhs11957.11311-117C6	35.36	12.94	2.16	0	1.51	51.97
Natural Killer Cells, donor3.CNhs12001.11387-118C1	24.77	17.97	3.59	0.77	3.98	51.08
Neural stem cells, donor1.CNhs11063.11275-116H6	5.08	3.05	0.25	3.56	1.27	13.21
Neural stem cells, donor2.CNhs11384.11352-117H2	6.51	2.6	0	0	0	9.11
neuroblastoma cell line:CHP-134.CNhs11276.10508-107D4	4.86	2.43	0.51	0.77	0.51	9.08
neuroblastoma cell line:NB-1.CNhs11284.10539-107G8	4.31	1.83	0.22	1.62	1.29	9.27
neuroblastoma cell line:NBsusSR.CNhs11818.10607-108F4	1.73	4.56	0	2.36	0.31	8.96
neuroblastoma cell line:NH-12.CNhs11811.10555-107I6	4.81	3.82	0.66	1.97	0.55	11.81
neuroectodermal tumor cell line:FU-RPNT-1.CNhs11744.10637-108I7	3.4	1.7	0.43	0.85	0.21	6.59
neuroectodermal tumor cell line:FU-RPNT-2.CNhs11753.10663-109C6	4.09	6.32	2.73	0.87	0.12	14.13
neuroectodermal tumor cell line:TASK1.CNhs11866.10774-110F9	2.38	5.94	0.85	2.55	0.34	12.06
neuroepithelioma cell line:SK-N-MC.CNhs11853.10728-110A8	1.68	5.59	2.79	1.12	0	11.18
neurofibroma cell line:Hs 53.T.CNhs11854.10729-110A9	8.59	9.22	2.86	1.59	1.27	23.53
Neurons, donor1.CNhs12338.11494-119E9	5.41	0.77	0	2.32	0.77	9.27
Neurons, donor2.CNhs12726.11574-120E8	3.35	1.68	0.17	1.51	0.5	7.21
Neurons, donor3.CNhs13815.11655-122E8	3.19	3.19	1.28	3.19	0.64	11.49
Neutrophils, donor1.CNhs10862.11233-116C9	14.98	19.47	3.75	0	2.25	40.45
Neutrophils, donor2.CNhs11959.11314-117C9	17.95	8.97	8.97	5.98	0	41.87
Neutrophils, donor3.CNhs11905.11390-118C4	8.7	16.99	2.9	2.49	0	31.08
NK T cell leukemia cell line:KHYG-1.CNhs11867.10777-110G3	6.16	10.42	1.68	0.22	0.34	18.82
non T non B acute lymphoblastic leukemia (ALL) cell line:P30/OHK.CNhs10747.10430-106D7	11.75	1.58	0.63	0.08	1.18	15.22
non-small cell lung cancer cell line:NCI-H1385.CNhs12193.10730-110B1	3.2	4.8	0	1.6	0	9.6
normal embryonic palatal mesenchymal cell line:HEPM.CNhs11894.10813-111B3	6.35	3.53	2.82	0.35	0	13.05
normal intestinal epithelial cell line:FHs 74 Int.CNhs11950.10812-111B2	5.82	3.37	5.21	0.31	0	14.71
nucleus accumbens, adult, pool1.CNhs10644.10037-101F1	11.82	7.51	2.12	12.2	4.11	37.76
Nucleus Pulposus Cell, donor1.CNhs10881.11252-116F1	11.53	7.48	0.86	0.61	0.49	20.97
Nucleus Pulposus Cell, donor2.CNhs12019.11409-118E5	13.5	4.5	1.5	0.5	0	20
Nucleus Pulposus Cell, donor3.CNhs12063.11462-119B4	6.24	10.31	1.63	0.27	0.27	18.72
occipital cortex - adult, donor10196.CNhs13798.10172-103C1	14.17	4.25	1.42	14.17	4.25	38.26
occipital cortex, adult, donor10252.CNhs12320.10163-103B1	10.54	5.91	3.51	13.73	4.95	38.64
occipital lobe, adult, donor1.CNhs11787.10076-102A4	12.92	11.69	2.67	9.44	6.36	43.08
occipital lobe, fetal, donor1.CNhs11784.10073-102A1	1.76	0.76	0.5	1.01	0.25	4.28
occipital pole, adult, pool1.CNhs10643.10036-101E9	13.42	9.54	1.31	21.3	8.78	54.35
Olfactory epithelial cells, donor1.CNhs13816.11933-125I7	9.15	7.49	3.33	0.83	0	20.8
Olfactory epithelial cells, donor2.CNhs13817.11934-125I8	11.42	6.96	1.78	0.54	0	20.7
Olfactory epithelial cells, donor3.CNhs13818.11935-125I9	9.46	6.78	3.94	0.47	0	20.65
Olfactory epithelial cells, donor4.CNhs13819.11936-126A1	10.43	8.43	5.39	1.17	0	25.42
olfactory region, adult.CNhs12611.10195-103E6	10.66	5.81	2.42	6.3	5.01	30.2
optic nerve, donor1.CNhs13449.10277-104E7	4.28	5.71	2.86	0	0	12.85
oral squamous cell carcinoma cell line:Ca9-22.CNhs10752.10434-106E2	5.01	15.61	1.86	1.86	0.49	24.83
oral squamous cell carcinoma cell line:HO-1-u-1.CNhs11287.10550-107I1	3.42	8.14	0.59	1.89	1.06	15.1
oral squamous cell carcinoma cell line:HSC-3.CNhs11717.10545-107H5	8.8	7.89	5.32	0	0.55	22.56
oral squamous cell carcinoma cell line:SAS.CNhs11810.10544-107H4	7.28	12.25	2.19	0.58	0.92	23.22
Osteoblast - differentiated, donor1.CNhs11311.11276-116H7	8.43	9.93	1.2	0.3	0.3	20.16
Osteoblast - differentiated, donor2.CNhs11980.11353-117H3	20.47	13.64	2.27	4.55	0	40.93
Osteoblast - differentiated, donor3.CNhs12035.11425-118G3	14.49	12.42	2.07	0	1.03	30.01
Osteoblast, donor2.CNhs11385.11354-117H4	10.63	5.31	0	0	0	15.94
Osteoblast, donor3.CNhs12036.11426-118G4	8.85	7.56	1.84	1.47	0.18	19.9
osteoclastoma cell line:Hs 706.T.CNhs11835.10704-109H2	11.82	6.86	1.53	0.38	0.38	20.97
osteosarcoma cell line:143B/TK^(-)neo^(R).CNhs11279.10510-107D6	4.83	4.83	0	0	0.69	10.35
osteosarcoma cell line:HS-Os-1.CNhs11290.10558-107I9	6.56	3.18	0.8	1.79	0.99	13.32
ovary, adult, pool1.CNhs10626.10020-101D2	14.52	7.75	3.23	3.61	0.83	29.94
pagetoid sarcoma cell line:Hs 925.T.CNhs11856.10732-110B3	5.65	4.24	3.83	0.61	0.61	14.94
pancreas, adult, donor1.CNhs11756.10049-101G4	4.69	4.69	5.47	1.56	0.78	17.19
pancreatic carcinoma cell line:NOR-P1.CNhs11832.10698-109G5	3.14	10.21	0	0.52	1.05	14.92
Pancreatic stromal cells, donor1.CNhs10877.11249-116E7	11.56	5.73	1.22	0.96	0.09	19.56
papillary adenocarcinoma cell line:8505C.CNhs11716.10437-106E5	6.22	6.55	0.66	0.16	0	13.59
papillotubular adenocarcinoma cell line:TGBC18TKB.CNhs10734.10417-106C3	7.98	10.05	3.4	0	0.15	21.58
paracentral gyrus, adult, pool1.CNhs10642.10035-101E8	13.85	8.04	1.62	18.44	7.9	49.85
parietal lobe - adult, donor10196.CNhs13797.10171-103B9	8.59	3.12	3.12	7.81	5.47	28.11
parietal lobe, adult, donor10252.CNhs12317.10157-103A4	10.95	5.17	2.89	15.71	5.99	40.71
parietal lobe, adult, pool1.CNhs10641.10034-101E7	14.65	10.65	1.97	21.05	7.61	55.93
parietal lobe, fetal, donor1.CNhs11782.10072-101I9	5.47	1.09	0	1.09	0	7.65
parotid gland, adult.CNhs12849.10199-103F1	8.22	3.84	1.64	1.1	0.55	15.35
penis, adult.CNhs12850.10200-103F2	14.89	5.46	2.98	2.48	3.97	29.78
Pericytes, donor1.CNhs11317.11491-119E6	15.47	10.18	2.15	1.96	1.37	31.13
Pericytes, donor2.CNhs12079.11571-120E5	6.52	8.92	0	3.09	1.03	19.56
Peripheral Blood Mononuclear Cells, donor1.CNhs10860.11231-116C7	22.95	12.82	2.48	0.62	2.48	41.35
Peripheral Blood Mononuclear Cells, donor2.CNhs11958.11312-117C7	27.18	12.73	4.96	0.22	2.37	47.46
Peripheral Blood Mononuclear Cells, donor3.CNhs12002.11388-118C2	31.48	15.9	4.59	0.64	2.56	55.17
peripheral neuroectodermal tumor cell line:KU-SN.CNhs11830.10697-109G4	1.58	1.93	0	0.88	0	4.39
pharyngeal carcinoma cell line:Detroit 562.CNhs11849.10723-110A3	9.58	4.6	0.77	0.77	0.77	16.49
pineal gland - adult, donor10196.CNhs13804.10179-103C8	8.04	10.71	5.36	2.14	0.54	26.79
pineal gland, adult, donor10252.CNhs12228.10160-103A7	12.11	11.43	12.78	2.35	0.67	39.34
pituitary gland - adult, donor10196.CNhs13805.10180-103C9	10.32	1.21	0	1.21	0	12.74
pituitary gland, adult, donor10252.CNhs12229.10162-103A9	5.92	7.51	1.59	5.69	0.91	21.62
placenta, adult, pool1.CNhs10627.10021-101D3	8.07	19.87	1.15	1.15	0.62	30.86
Placental Epithelial Cells, donor1.CNhs11079.11278-116H9	6.37	15.16	0.91	0.61	0.3	23.35
Placental Epithelial Cells, donor2.CNhs11386.11355-117H5	24.97	4.99	1.66	0	0	31.62
Placental Epithelial Cells, donor3.CNhs12037.11427-118G5	13.31	6.05	0.6	0.6	0	20.56
plasma cell leukemia cell line:ARH-77.CNhs12807.10840-111E3	2.54	5.3	0.92	0.46	0.58	9.8
pleomorphic hepatocellular carcinoma cell line:SNU-387.CNhs11933.10706-109H4	5.14	7.89	3.94	0.17	0.17	17.31
pons, adult, pool1.CNhs10640.10033-101E6	17.4	7.95	1.77	9.79	5.1	42.01
postcentral gyrus, adult, pool1.CNhs10638.10032-101E5	11.84	8.48	1.05	19.34	8.35	49.06
Preadipocyte - breast, donor1.CNhs11052.11467-119B9	12.9	6.95	0	0.74	0.74	21.33
Preadipocyte - breast, donor2 (nuclear fraction).CNhs12584.14320-155D9	14.89	5.37	1.84	1.38	0.46	23.94
Preadipocyte - breast, donor2.CNhs11971.11328-117E5	10.1	6.74	1.12	1.4	0	19.36
Preadipocyte - omental, donor1.CNhs11065.11468-119C1	11.28	8.84	0.64	1.67	0.26	22.69
Preadipocyte - omental, donor2.CNhs11902.11329-117E6	9.72	3.58	1.02	1.54	1.02	16.88
Preadipocyte - omental, donor3.CNhs12013.11403-118D8	12.06	7.24	1.45	1.13	0.16	22.04
Preadipocyte - perirenal, donor1.CNhs12065.11469-119C2	16.33	4.45	1.48	1.48	0	23.74
Preadipocyte - subcutaneous, donor2.CNhs11981.11356-117H6	7.4	10.79	0.31	1.08	0.62	20.2
Preadipocyte - subcutaneous, donor3.CNhs12038.11428-118G6	12.78	7.28	0.89	1.42	0.71	23.08
Preadipocyte - visceral, donor1.CNhs11082.11280-116I2	10.27	8.62	0.41	1.48	0.33	21.11
Preadipocyte - visceral, donor2.CNhs11982.11357-117H7	10.39	7.79	0.52	1.04	0	19.74
Preadipocyte - visceral, donor3.CNhs12039.11429-118G7	8.48	15.22	0.46	1.28	0.46	25.9
prostate cancer cell line:DU145.CNhs11260.10490-107B4	4.37	6.62	1.06	0.24	0.47	12.76
prostate cancer cell line:PC-3.CNhs11243.10439-106E7	2.67	3.56	1.67	0.44	0.11	8.45
Prostate Epithelial Cells (polarized), donor1.CNhs10882.11253-116F2	2.78	4.11	0.24	0.24	0.73	8.1
Prostate Epithelial Cells, donor2.CNhs11972.11331-117E8	12.83	10.03	4.01	1.2	0.2	28.27
Prostate Epithelial Cells, donor3.CNhs12014.11404-118D9	8.38	23.39	1.66	3.5	0.09	37.02
Prostate Stromal Cells, donor1.CNhs10883.11254-116F3	6.89	5.05	2.53	0.46	0.23	15.16
Prostate Stromal Cells, donor2.CNhs11973.11332-117E9	9.47	7.47	1.64	0.55	0	19.13
Prostate Stromal Cells, donor3.CNhs12015.11405-118E1	8.39	6.43	2.75	0.79	0.13	18.49
prostate, adult, pool1.CNhs10628.10022-101D4	15.93	8.08	3.92	2.12	1.65	31.7
putamen, adult, donor10196.CNhs12324.10176-103C5	12.73	5.03	2.99	10.53	0.31	31.59
rectal cancer cell line:TT1TKB.CNhs11255.10469-106I1	2.8	17.1	1.4	1.4	0.28	22.98
rectum, fetal, donor1.CNhs11777.10067-101I4	9.13	7.31	3.65	1.83	0.91	22.83
renal cell carcinoma cell line:OS-RC-2.CNhs10729.10411-106B6	4.32	4.97	1.94	0.43	0	11.66
renal cell carcinoma cell line:TUHR10TKB.CNhs11257.10471-106I3	3.82	1.91	1.43	0	0	7.16
Renal Cortical Epithelial Cells, donor1.CNhs11331.11516-119H4	13.99	17.6	1.8	0.9	0	34.29
Renal Cortical Epithelial Cells, donor2.CNhs12728.11596-120H3	4.62	10.4	1	0.23	0.15	16.4
Renal Epithelial Cells, donor1.CNhs11332.11517-119H5	8.63	13.33	1.57	3.14	0	26.67
Renal Epithelial Cells, donor2.CNhs12088.11597-120H4	11.69	11.69	0	0	0	23.38
Renal Epithelial Cells, donor3.CNhs12732.11678-122H4	3.8	6.33	0.53	0.74	0.32	11.72
Renal Glomerular Endothelial Cells, donor1.CNhs12074.11514-119H2	23.88	9.1	0	2.27	0	35.25
Renal Glomerular Endothelial Cells, donor2.CNhs12086.11594-120H1	10.72	6.29	2.72	0	0.51	20.24
Renal Glomerular Endothelial Cells, donor3.CNhs12624.11675-122H1	6.05	3.67	0.65	0	0.65	11.02
Renal Glomerular Endothelial Cells, donor4.CNhs13080.11783-124B1	10.8	6.17	1.54	1.54	0	20.05
Renal Mesangial Cells, donor1.CNhs11333.11518-119H6	8.4	9.48	1.08	1.35	0.27	20.58
Renal Mesangial Cells, donor3.CNhs12121.11679-122H5	7.02	7.53	1	1.51	0.5	17.56
Renal Proximal Tubular Epithelial Cell, donor1.CNhs11330.11515-119H3	7.39	14.27	1.02	0	0.51	23.19
Renal Proximal Tubular Epithelial Cell, donor2.CNhs12087.11595-120H2	9.14	18.28	1.66	2.49	0	31.57
Renal Proximal Tubular Epithelial Cell, donor3.CNhs12120.11676-122H2	5.15	12.98	0.67	1.57	0.45	20.82
Reticulocytes, biol_rep1.CNhs13552.11931-125I5	21.27	0	35.52	0.22	0.22	57.23
Reticulocytes, biol_rep2.CNhs13553.11932-125I6	29.8	1.57	39.22	0.26	1.05	71.9
retina, adult, pool1.CNhs10636.10030-101E3	16.08	9.15	3.72	2.22	1.93	33.1
Retinal Pigment Epithelial Cells, donor0.CNhs10842.11215-116A9	4.1	9.75	1.03	1.54	0.26	16.68
Retinal Pigment Epithelial Cells, donor1.CNhs11338.11528-119I7	5.58	7.22	0.98	0.33	0.33	14.44
Retinal Pigment Epithelial Cells, donor3.CNhs12733.11689-122I6	2.93	7.16	0.98	0	0	11.07
retinoblastoma cell line:Y79.CNhs11267.10475-106I7	4.42	6	2.37	1.9	0.63	15.32
rhabdomyosarcoma cell line:KYM-1.CNhs11877.10787-110H4	7.09	6.39	0	1.28	0.46	15.22
rhabdomyosarcoma cell line:RMS-YM.CNhs11269.10477-106I9	1.74	5.04	0	0.7	0.52	8
SABiosciences XpressRef Human Universal Total RNA, pool1.CNhs10610.10002-101A5	8.24	9.89	4.33	1.75	0.62	24.83
sacrococcigeal teratoma cell line:HTST.CNhs11829.10695-109G2	16.03	9.62	4.01	0	0	29.66
salivary acinar cells, donor1.CNhs12810.11771-123I7	7.25	16.99	2.07	0.21	0.41	26.93
salivary acinar cells, donor2.CNhs12811.11772-123I8	11.27	12.8	1.54	0.68	1.2	27.49
salivary acinar cells, donor3.CNhs12812.11773-123I9	10.37	29.72	1.38	0.69	0	42.16
salivary gland, adult, pool1.CNhs11677.10093-102C3	15.92	9.47	5.59	0.86	1.29	33.13
Saos-2 osteosarcoma treated with ascorbic acid and BGP to induce calcification, 00hr00min, biol_rep2 (A2 T0).CNhs12859.12760-136B6	5.68	2.29	1.65	0.64	1.1	11.36
Saos-2 osteosarcoma treated with ascorbic acid and BGP to induce calcification, 00hr00min, biol_rep3 (A3 T0).CNhs12952.12858-137D5	4.46	3.3	1.24	0.66	0.74	10.4
schwannoma cell line:HS-PSS, tech_rep2.CNhs11245.10442-106F1	7.69	5.56	1.42	0.71	0.12	15.5
schwannoma cell line:HS-PSS.CNhs11183.10442-106F1	10.48	9.03	1.11	1.11	0	21.73
Sebocyte, donor1.CNhs10847.11220-116B5	14.93	33.31	2.87	0	0	51.11
Sebocyte, donor2.CNhs11951.11301-117B5	14.95	18.2	0.65	0	0	33.8
seminal vesicle, adult.CNhs12851.10201-103F3	13.97	6.77	3.39	2.12	1.69	27.94
serous adenocarcinoma cell line:JHOS-2.CNhs11746.10639-108I9	5.27	6.19	0.69	0	0.69	12.84
serous adenocarcinoma cell line:SK-OV-3-R after co-culture with SOC-57-02-G, biol_rep1.CNhs13508.11843-124H7	10.86	4.65	2.48	0.31	0.62	18.92
serous adenocarcinoma cell line:SK-OV-3-R, biol_rep1.CNhs13099.11841-124H5	4.78	3.82	0	1.91	0.96	11.47
serous cystadenocarcinoma cell line:HTOA.CNhs11827.10693-109F9	7.49	6.38	1.34	0.11	0.22	15.54
Sertoli Cells, donor1.CNhs10851.11255-116F4	11.25	4.82	3.21	1.61	0	20.89
signet ring carcinoma cell line:Kato III.CNhs10753.10436-106E4	8.24	9.23	1.08	0.29	0.49	19.33
signet ring carcinoma cell line:NUGC-4.CNhs11270.10483-107A6	7.68	16.82	3.41	1.22	0.73	29.86
skeletal muscle - soleus muscle, donor1.CNhs13454.10282-104F3	2.59	11.01	0.65	2.59	0.65	17.49
Skeletal muscle cells differentiated into Myotubes - multinucleated, donor1.CNhs11084.11282-116I4	6.05	5.25	0.18	0.89	0.45	12.82
Skeletal Muscle Cells, donor1.CNhs11083.11281-116I3	6.86	8.12	0.87	1.84	0.58	18.27
Skeletal Muscle Cells, donor4.CNhs12053.11451-119A2	4.31	8.63	0.77	1.85	0	15.56
Skeletal Muscle Cells, donor5.CNhs12056.11455-119A6	5.37	7.98	0.46	1.69	0.46	15.96
Skeletal Muscle Cells, donor6.CNhs12060.11459-119B1	3.31	10.2	0.55	0.96	0.28	15.3
Skeletal Muscle Satellite Cells, donor1.CNhs10869.11240-116D7	7.3	4.51	0.97	0.64	0	13.42
Skeletal Muscle Satellite Cells, donor2.CNhs11964.11321-117D7	8.85	5.37	1.16	0.44	0.58	16.4
Skeletal Muscle Satellite Cells, donor3.CNhs12008.11397-118D2	4.77	6.65	0.6	1.45	0.26	13.73
skeletal muscle, adult, pool1.CNhs10629.10023-101D5	7.29	27.72	1.54	2.16	1.33	40.04
skeletal muscle, fetal, donor1.CNhs11776.10066-101I3	3.48	1.16	1.16	0	1.16	6.96
skin, fetal, donor1.CNhs11774.10065-101I2	11.17	7.29	2.91	0	0	21.37
Small Airway Epithelial Cells, donor1.CNhs10884.11256-116F5	10.08	13.39	0.99	0.66	0	25.12
Small Airway Epithelial Cells, donor2.CNhs11975.11334-117F2	10.19	20.37	3.65	1.35	1.15	36.71
Small Airway Epithelial Cells, donor3 (nuclear fraction).CNhs12583.14317-155D6	11.36	11.87	2.42	1.02	0.51	27.18
Small Airway Epithelial Cells, donor3.CNhs12016.11406-118E2	12.54	23.37	2.63	1.82	0.3	40.66
small cell cervical cancer cell line:HCSC-1.CNhs11885.10800-110I8	2.57	3.51	1.64	0.94	0.7	9.36
small cell gastrointestinal carcinoma cell line:ECC10.CNhs11736.10610-108F7	1.79	3.18	0.6	0.4	0	5.97
small cell lung carcinoma cell line:DMS 144.CNhs12808.10841-111E4	1.31	3.57	0.12	0.83	0.12	5.95
small cell lung carcinoma cell line:LK-2.CNhs11285.10541-107H1	3.73	2.37	0.23	0.56	0.45	7.34
small cell lung carcinoma cell line:NCI-H82.CNhs12809.10842-111E5	2.09	4.84	0.66	1.1	0	8.69
small cell lung carcinoma cell line:WA-hT.CNhs11812.10562-108A4	3.62	2.11	0.15	0.45	0	6.33
small intestine, adult, pool1.CNhs10630.10024-101D6	25.47	15.82	8.64	1.85	1.54	53.32
small intestine, fetal, donor1.CNhs11773.10064-101I1	15.95	8.09	5.9	0.87	0.66	31.47
small-cell gastrointestinal carcinoma cell line:ECC4.CNhs11734.10609-108F6	12.7	9.41	3.76	0.47	1.41	27.75
Smooth Muscle Cells - Aortic, donor0 (cytoplasmic fraction).CNhs12401.14313-155D2	6.51	6.04	2.79	0.93	0.46	16.73
Smooth Muscle Cells - Aortic, donor0 (nuclear fraction).CNhs12402.14314-155D3	17.31	10.07	1.57	0.63	0.31	29.89
Smooth Muscle Cells - Aortic, donor0.CNhs10838.11210-116A4	11.85	12.55	2.09	0.7	0	27.19
Smooth Muscle Cells - Aortic, donor1.CNhs11085.11283-116I5	20.95	15.09	5.54	2.16	0.31	44.05
Smooth Muscle Cells - Aortic, donor2.CNhs11305.11360-117I1	10.65	10.11	1.06	0.53	1.6	23.95
Smooth Muscle Cells - Aortic, donor3.CNhs11309.11432-118H1	9.57	8.7	0.87	2.61	0	21.75
Smooth Muscle Cells - Brachiocephalic, donor1.CNhs11086.11284-116I6	8.9	12.6	2.59	0.74	0.37	25.2
Smooth Muscle Cells - Brachiocephalic, donor3.CNhs12043.11433-118H2	2.29	4.58	0.86	0.57	0	8.3
Smooth Muscle Cells - Brain Vascular, donor1.CNhs10863.11234-116D1	5.58	7.44	1.86	0.74	0.37	15.99
Smooth Muscle Cells - Brain Vascular, donor2.CNhs11900.11315-117D1	4.43	4.75	0.32	1.9	0.95	12.35
Smooth Muscle Cells - Brain Vascular, donor3.CNhs12004.11391-118C5	4.96	7.24	1.53	1.72	0.76	16.21
Smooth Muscle Cells - Bronchial, donor1.CNhs11328.11512-119G9	11.77	14.07	4.09	1.79	1.02	32.74
Smooth Muscle Cells - Bronchial, donor2.CNhs12348.11592-120G8	8.56	7.27	1.28	0.86	0.86	18.83
Smooth Muscle Cells - Carotid, donor1.CNhs11087.11285-116I7	15.59	10.82	2.23	0.64	0.32	29.6
Smooth Muscle Cells - Carotid, donor3.CNhs12044.11434-118H3	9.42	13.34	1.57	1.57	0.78	26.68
Smooth Muscle Cells - Colonic, donor1.CNhs10868.11239-116D6	2.34	3.96	0.72	0.36	0.54	7.92
Smooth Muscle Cells - Colonic, donor2.CNhs11963.11320-117D6	6.31	5.49	1.65	1.1	0	14.55
Smooth Muscle Cells - Colonic, donor3.CNhs12007.11396-118D1	5.18	6.36	1.18	0.24	0.24	13.2
Smooth Muscle Cells - Coronary Artery, donor1.CNhs11088.11286-116I8	11.32	11.12	1.62	1.21	0.2	25.47
Smooth Muscle Cells - Coronary Artery, donor2.CNhs11987.11363-117I4	7.93	12.68	3.17	1.59	0	25.37
Smooth Muscle Cells - Coronary Artery, donor3.CNhs12045.11435-118H4	4.21	10.95	3.37	1.26	0.84	20.63
Smooth Muscle Cells - Esophageal, donor1.CNhs11324.11508-119G5	6.34	15.6	1.46	0.49	0.49	24.38
Smooth Muscle Cells - Internal Thoracic Artery, donor2.CNhs11988.11364-117I5	15.35	12.92	3.66	0.24	0.24	32.41
Smooth Muscle Cells - Internal Thoracic Artery, donor3.CNhs12046.11436-118H5	7.4	10.57	5.28	0	1.06	24.31
Smooth Muscle Cells - Prostate, donor1.CNhs11920.11257-116F6	9.28	4.78	2.05	0.96	0.41	17.48
Smooth Muscle Cells - Prostate, donor2.CNhs11976.11335-117F3	8.77	6.93	2.83	0.28	0	18.81
Smooth Muscle Cells - Pulmonary Artery, donor2.CNhs11989.11365-117I6	25.99	6.78	1.13	2.26	1.13	37.29
Smooth Muscle Cells - Subclavian Artery, donor1.CNhs11090.11289-117A2	13.23	6.62	0.55	1.65	0.55	22.6
Smooth Muscle Cells - Subclavian Artery, donor2.CNhs11990.11366-117I7	15.26	5.31	0	1.99	0	22.56
Smooth Muscle Cells - Subclavian Artery, donor3.CNhs12048.11438-118H7	13.15	13.59	0.88	2.19	0.44	30.25
Smooth Muscle Cells - Tracheal, donor1.CNhs11329.11513-119H1	8.68	17.94	2.32	0	0.58	29.52
Smooth Muscle Cells - Tracheal, donor3.CNhs12894.11674-122G9	10.49	5.25	1.31	1.97	0.66	19.68
Smooth Muscle Cells - Umbilical artery, donor0.CNhs10839.11212-116A6	6.06	9.27	2.5	0	1.43	19.26
Smooth Muscle Cells - Umbilical Artery, donor1.CNhs11091.11290-117A3	7.1	6.29	2.64	0.41	0.61	17.05
Smooth Muscle Cells - Umbilical Artery, donor2.CNhs11991.11367-117I8	7.13	10.22	1.24	1.24	1.24	21.07
Smooth Muscle Cells - Umbilical Artery, donor3.CNhs12049.11439-118H8	11.55	5.35	1.41	0.85	0.28	19.44
Smooth Muscle Cells - Umbilical Vein, donor1.CNhs12597.11541-120B2	4.3	3.3	0.72	0.57	0.29	9.18
Smooth Muscle Cells - Umbilical Vein, donor2.CNhs12569.11621-122B1	5.5	5.5	2.06	0.49	0	13.55
Smooth Muscle Cells - Uterine, donor3.CNhs11927.11466-119B8	6.03	4.97	1.06	2.13	0.71	14.9
smooth muscle, adult, pool1.CNhs11755.10048-101G3	17.41	9.81	2.94	2.45	1.23	33.84
somatostatinoma cell line:QGP-1.CNhs11869.10781-110G7	2.83	8.96	3.3	0.24	0	15.33
spinal cord - adult, donor10196.CNhs13807.10181-103D1	4.71	5.69	1.96	3.34	1.18	16.88
spinal cord, adult, donor10252.CNhs12227.10159-103A6	10.99	5.94	2.97	2.67	0	22.57
spinal cord, fetal, donor1.CNhs11764.10056-101H2	9.3	4.65	1.27	3.8	0.85	19.87
spindle cell sarcoma cell line:Hs 132.T.CNhs11857.10737-110B8	11.05	13.76	2.55	0.34	0	27.7
spleen, adult, pool1.CNhs10631.10025-101D7	17.86	13.16	1.41	1.41	0.75	34.59
spleen, fetal, pool1.CNhs10651.10044-101F8	18.95	8.12	4.77	1.93	0.64	34.41
splenic lymphoma with villous lymphocytes cell line:SLVL.CNhs10741.10424-106D1	4.9	15.09	1.3	0.4	0.1	21.79
squamous cell carcinoma cell line:EC-GI-10.CNhs11252.10463-106H4	8.57	11.25	1.79	1.07	0	22.68
squamous cell carcinoma cell line:T3M-5.CNhs11739.10616-108G4	8.47	20.82	4.23	0	1.06	34.58
squamous cell lung carcinoma cell line:EBC-1.CNhs11273.10486-107A9	6.9	8.75	1.85	1.44	0.64	19.58
stomach, fetal, donor1.CNhs11771.10062-101H8	12.42	8.03	2.19	4.38	0.73	27.75
submaxillary gland, adult.CNhs12852.10202-103F4	13.3	7.34	8.26	2.29	0.46	31.65
substantia nigra, adult, donor10252.CNhs12318.10158-103A5	13.04	10.03	4.3	4.59	0.72	32.68
synovial sarcoma cell line:HS-SY-II.CNhs11244.10441-106E9	3	4.73	0	1.74	1.74	11.21
Synoviocyte, donor2.CNhs11992.11368-117I9	21.11	9.08	1.48	1.69	0	33.36
Synoviocyte, donor3.CNhs12050.11440-118H9	25.03	9.22	2.63	0.33	0.33	37.54
temporal lobe, adult, pool1.CNhs10637.10031-101E4	13.05	10.13	1.36	14.55	5.85	44.94
temporal lobe, fetal, donor1, tech_rep1.CNhs11772.10063-101H9	1.31	0	0.87	2.18	0	4.36
temporal lobe, fetal, donor1, tech_rep2.CNhs12996.10063-101H9	3.06	1.53	0.92	1.84	0.61	7.96
tenocyte, donor1.CNhs12639.11763-123H8	15.25	4.46	3.72	2.23	0	25.66
tenocyte, donor2.CNhs12640.11765-123I1	18.95	5.55	2.77	1.85	0.46	29.58
tenocyte, donor3.CNhs12641.11768-123I4	20.33	6.49	1.3	0.43	0.43	28.98
teratocarcinoma cell line:NCC-IT-A3.CNhs11878.10790-110H7	0.98	4.92	0.11	0.22	0.33	6.56
teratocarcinoma cell line:NCR-G1.CNhs11884.10798-110I6	0.76	5.19	0.63	0.89	0.25	7.72
teratocarcinoma cell line:PA-1.CNhs11890.10807-111A6	0.38	6.81	0	1.51	0.13	8.83
testicular germ cell embryonal carcinoma cell line:ITO-II.CNhs11876.10786-110H3	1.53	7.96	0	1.73	0.51	11.73
testicular germ cell embryonal carcinoma cell line:NEC14.CNhs12351.10591-108D6	0.53	3.74	0	0.27	0	4.54
testicular germ cell embryonal carcinoma cell line:NEC15.CNhs12362.10593-108D8	2.57	6.52	0.28	0.83	1.93	12.13
testicular germ cell embryonal carcinoma cell line:NEC8.CNhs11726.10590-108D5	0.75	3.51	0	1	0	5.26
testis, adult, pool1.CNhs10632.10026-101D8	9.25	8.71	1.06	1.89	0.76	21.67
testis, adult, pool2.CNhs12998.10096-102C6	6.43	4.56	0.54	1.34	0.8	13.67
thalamus - adult, donor10196.CNhs13794.10168-103B6	4.98	3.32	2.49	2.49	0	13.28
thalamus, adult, donor10252.CNhs12314.10154-103A1	11.48	8.07	6.21	4.34	1.55	31.65
throat, adult.CNhs12858.10209-103G2	18.55	12.79	3.41	1.71	0.43	36.89
throat, fetal, donor1.CNhs11770.10061-101H7	7.86	1.67	2.86	0.71	0.48	13.58
thymus, adult, pool1.CNhs10633.10027-101D9	14.66	4.46	0.45	1.74	0.58	21.89
thymus, fetal, pool1.CNhs10650.10043-101F7	17.26	4.59	1.49	2.86	0.56	26.76
thyroid carcinoma cell line:TCO-1.CNhs11872.10783-110G9	7.06	9.08	1.68	0.56	0.34	18.72
thyroid, adult, pool1.CNhs10634.10028-101E1	8.78	6.11	1.65	4.01	0.95	21.5
thyroid, fetal, donor1.CNhs11769.10060-101H6	7.48	3.23	2.22	2.02	1.21	16.16
tongue, adult.CNhs12853.10203-103F5	19.16	16.55	1.09	2.83	1.52	41.15
tongue, fetal, donor1.CNhs11768.10059-101H5	12.66	9.92	3.08	1.71	0.68	28.05
tonsil, adult, pool1.CNhs10654.10047-101G2	25.19	16.3	3.84	1.28	1.41	48.02
Trabecular Meshwork Cells, donor1.CNhs11340.11532-120A2	10.25	9.87	1.52	0.76	1.52	23.92
Trabecular Meshwork Cells, donor3.CNhs12124.11693-123A1	7	7	1.05	2.1	0.35	17.5
trachea, adult, pool1.CNhs10635.10029-101E2	18.58	14.63	3.8	1.22	0.86	39.09
trachea, fetal, donor1.CNhs11766.10058-101H4	9.65	4.99	2	1	0	17.64
Tracheal Epithelial Cells, donor1.CNhs11092.11292-117A5	10.3	16.07	1.54	0.58	0.38	28.87
Tracheal Epithelial Cells, donor2.CNhs11993.11369-118A1	19.44	26.81	3.35	0	0	49.6
Tracheal Epithelial Cells, donor3.CNhs12051.11441-118I1	6.53	23.96	0	0	1.09	31.58
transitional-cell carcinoma cell line:5637.CNhs10735.10418-106C4	5.62	8.55	3.09	1.14	0.9	19.3
transitional-cell carcinoma cell line:JMSU1.CNhs11261.10492-107B6	4.8	7.47	0.75	1.17	0.32	14.51
tridermal teratoma cell line:HGRT.CNhs11828.10694-109G1	3.86	9.65	1.93	0	0	15.44
tubular adenocarcinoma cell line:SUIT-2.CNhs11883.10797-110I5	9.79	10.96	3.5	0.27	0.45	24.97
umbilical cord, fetal, donor1.CNhs11765.10057-101H3	7.04	7.04	4.69	2.35	2.35	23.47
Universal RNA - Human Normal Tissues Biochain, pool1.CNhs10612.10007-101B4	8.38	11.67	3.77	1.13	0.66	25.61
Urothelial cells, donor0.CNhs10843.11216-116B1	14.7	17.92	5.05	0.69	0.92	39.28
Urothelial Cells, donor1.CNhs11334.11520-119H8	22.82	27.98	6.03	2.58	0	59.41
Urothelial Cells, donor2.CNhs12091.11600-120H7	18.53	18.53	3.37	1.68	1.68	43.79
Urothelial Cells, donor3.CNhs12122.11681-122H7	28.82	34.14	7.09	0.89	0.89	71.83
uterus, adult, pool1.CNhs11676.10100-102D1	16.5	6.36	3.06	2.69	1.22	29.83
uterus, fetal, donor1.CNhs11763.10055-101H1	7.73	9.36	2.44	1.22	0	20.75
vagina, adult.CNhs12854.10204-103F6	11.32	10.65	8.65	2	2	34.62
vein, adult.CNhs12844.10191-103E2	15.5	6.84	1.01	2.01	0.6	25.96
Whole blood (ribopure), donor090309, donation1.CNhs11675.12179-129A1	23.85	9.64	8.12	1.01	1.01	43.63
Whole blood (ribopure), donor090309, donation2.CNhs11671.12180-129A2	16.82	6.88	15.29	0	0	38.99
Whole blood (ribopure), donor090309, donation3.CNhs11948.12181-129A3	18.23	5.7	10.25	1.71	1.71	37.6
Whole blood (ribopure), donor090325, donation1.CNhs11075.12176-128I7	20.96	6.91	3.34	0.71	0.48	32.4
Whole blood (ribopure), donor090325, donation2.CNhs11076.12177-128I8	15.22	7.82	2.88	0.82	0.82	27.56
Whole blood (ribopure), donor090612, donation1.CNhs11672.12182-129A4	13.62	9.08	8.43	1.3	1.3	33.73
Whole blood (ribopure), donor090612, donation2.CNhs11673.12183-129A5	18.36	6.48	10.26	1.08	0	36.18
Whole blood (ribopure), donor090612, donation3.CNhs11949.12184-129A6	21.41	14.28	9.52	1.59	0.79	47.59
Wilms' tumor cell line:G-401.CNhs11892.10809-111A8	4.59	5.13	1.07	0.64	0.32	11.75
Wilms' tumor cell line:HFWT.CNhs11728.10597-108E3	4.81	12.51	0.96	8.66	0	26.94
xeroderma pigentosum b cell line:XPL 17.CNhs11813.10563-108A5	7.37	15.39	0	0.32	0.64	23.72
Median - all cell lines	8.92	7.29	1.79	0.89	0.45

## Sheet: Supplementary Table 10
Supplementary table 9: Summary of highest ZBTBB7A exressing tissues from Supplementary table 9. Transcription start sites (TSSs) for ZBTB7A from Fantom5 Promoter Atlas showing both the absolute peak size and percentage of ZBTB7A transcript expressed from each TSS.
Tissue (Absolute peak size)	Promoter 1	Promoter 2	Promoter 3	Promoter 4	Promoter 5	Sum
Mast cells	64.72	7.92	15.41	0.92	2.91	91.89
granulocyte macrophage progenitor	42.16	20.44	6.39	2.55	3.83	75.37
CD14+ Monocyte	28.09	28.24	4.45	1.77	3.13	65.69
Colon	31.85	17.56	10.46	2.43	2.92	65.21
Reticulocytes	25.54	0.79	37.37	0.24	0.64	64.57
esophagus	27.84	26.67	6.69	1.75	1.07	64.02
Urothelial Cells	23.39	26.88	5.5	1.72	0.86	58.34
Eosinophils	16.29	29.35	11.09	0	0	56.72
CD8+ T Cells	31.91	16.15	2.84	0.39	2.21	53.5
Basophils	27.44	16.51	4.1	0.93	2.91	51.9
Tissue (percentage peak size)	Promoter 1	Promoter 2	Promoter 3	Promoter 4	Promoter 5	Sum
Mast cells	0.7	0.09	0.17	0.01	0.03	1
granulocyte macrophage progenitor	0.56	0.27	0.08	0.03	0.05	1
CD14+ Monocyte	0.43	0.43	0.07	0.03	0.05	1
Colon	0.49	0.27	0.16	0.04	0.04	1
Reticulocytes	0.4	0.01	0.58	0	0.01	1
esophagus	0.43	0.42	0.1	0.03	0.02	1
Urothelial Cells	0.4	0.46	0.09	0.03	0.01	1
Eosinophils	0.29	0.52	0.2	0	0	1
CD8+ T Cells	0.6	0.3	0.05	0.01	0.04	1
Basophils	0.53	0.32	0.08	0.02	0.06	1

[truncated: 2 more sheets: Supplementary Table 11, Supplementary Table 12]
